# Supplementary material
Source: PubMed Central journal article supplement (PMC1458676)
Supplement: pnas_0601266103_1.pdf [file pnas_0601266103_1.pdf]

**(a)**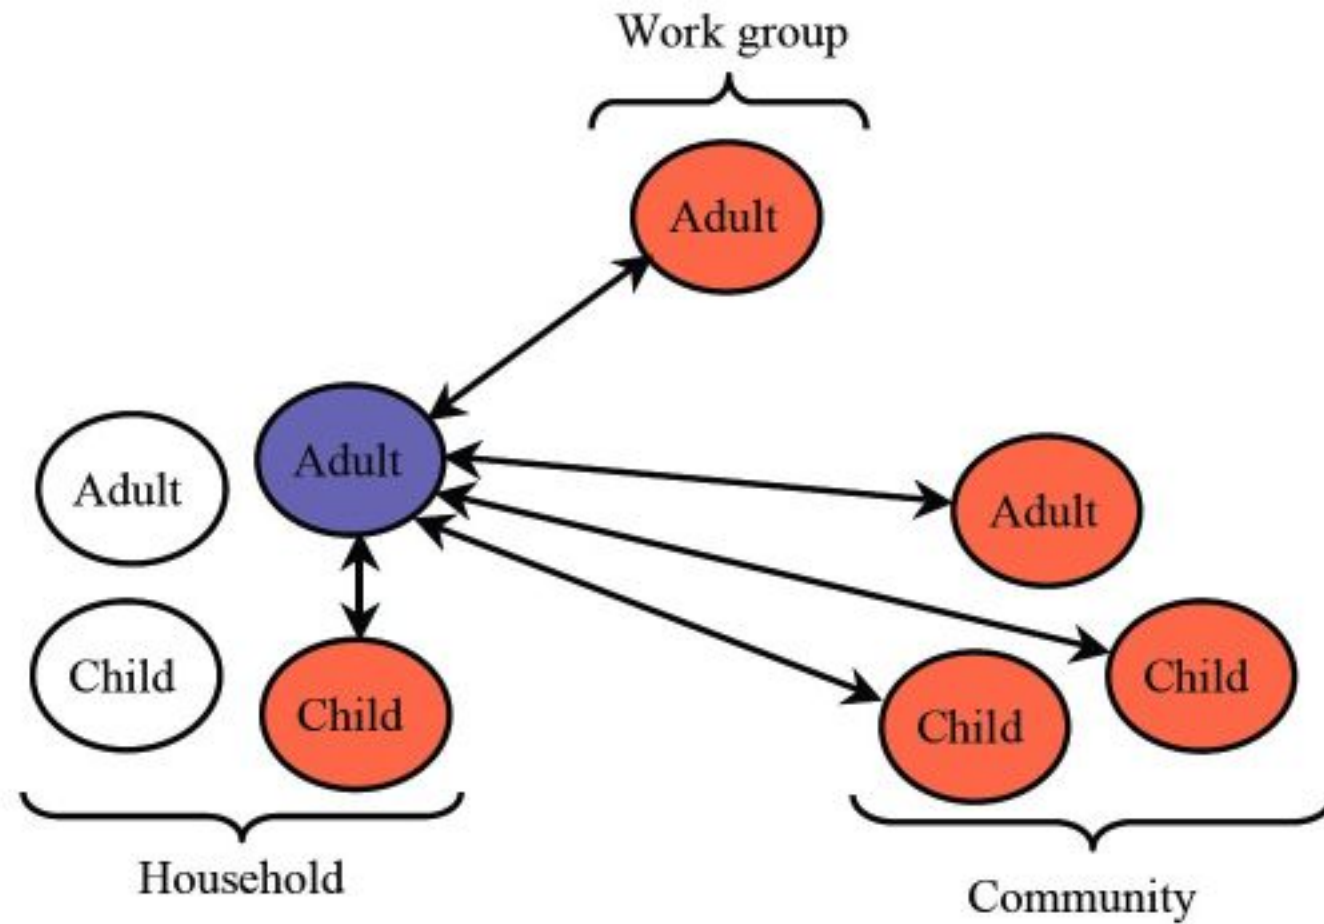**(b)**

Probability of infecting others

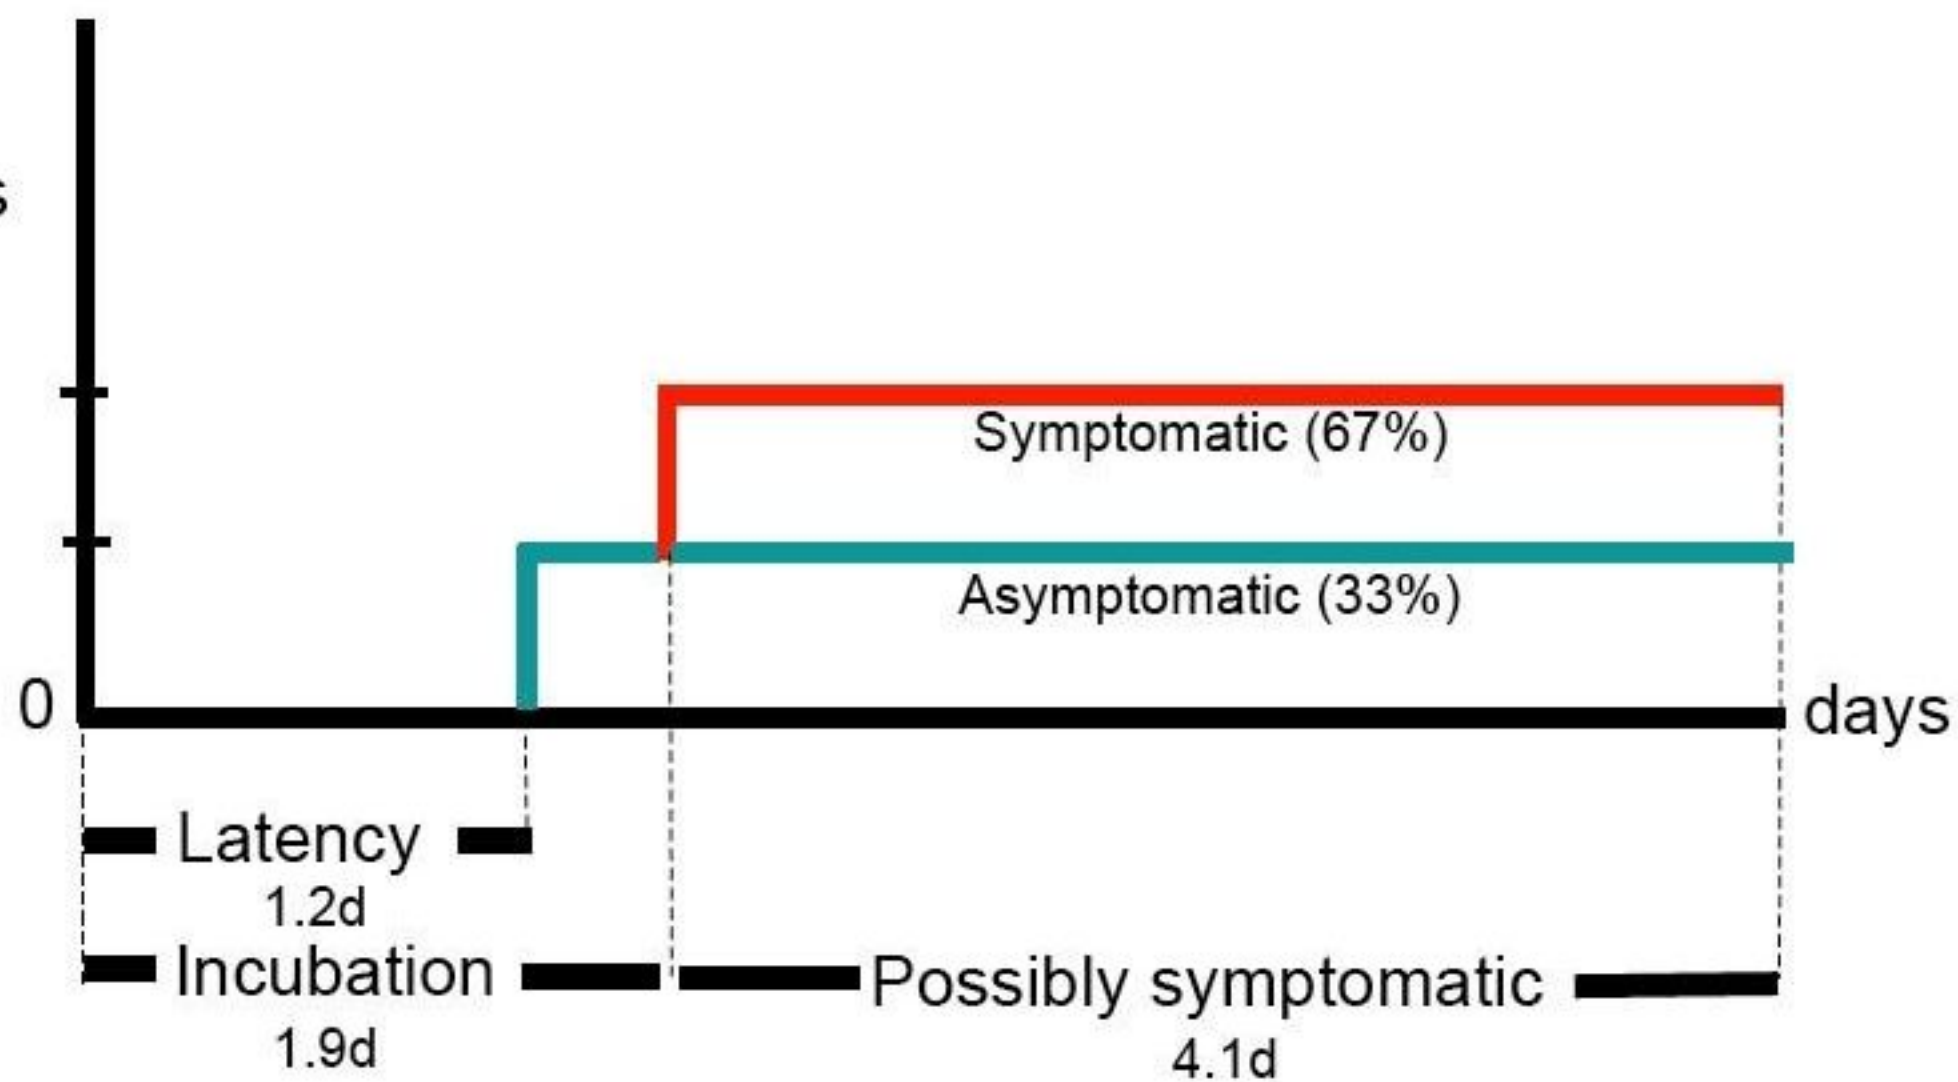

|                        | Incubation (latent) period |       |       | Possibly symptomatic period |     |     |     |
|------------------------|----------------------------|-------|-------|-----------------------------|-----|-----|-----|
| Number of days         | 1 (1)                      | 2 (1) | 3 (2) | 3                           | 4   | 5   | 6   |
| Probability (all ages) | 0.3                        | 0.5   | 0.2   | 0.3                         | 0.4 | 0.2 | 0.1 |
