# Supplementary material
Source: PubMed Central journal article supplement (PMC1458676)
Supplement: pnas_0601266103_10.pdf [file pnas_0601266103_10.pdf]

**Table 3. Daily contact probabilities for different contact groups**

| <b>Contact group</b> | <b>Infected</b> | <b>Susceptible</b> | <b>Contact probability</b> |
|----------------------|-----------------|--------------------|----------------------------|
| Household            | Child           | Child              | 0.6                        |
| Household            | Child           | Adult              | 0.3                        |
| Household            | Adult           | Child              | 0.3                        |
| Household            | Adult           | Adult              | 0.4                        |
| Household cluster    | Child           | Child              | 0.075                      |
| Household cluster    | Child           | Adult              | 0.04                       |
| Household cluster    | Adult           | Child              | 0.04                       |
| Household cluster    | Adult           | Adult              | 0.05                       |
| Small play group     | Child 0-4       | Child 0-4          | 0.35                       |
| Large daycare        | Child 0-4       | Child 0-4          | 0.15                       |
| Elementary school    | Child 5-18      | Child 5-18         | 0.0435                     |
| Middle school        | Child 5-18      | Child 5-18         | 0.0375                     |
| High school          | Child 5-18      | Child 5-18         | 0.0315                     |
| Workgroup            | Adult 19-64     | Adult 19-64        | 0.0575                     |
| Neighborhood         | Anyone          | Adult 65+          | 0.00087                    |
| Neighborhood         | Anyone          | Adult 19-64        | 0.00058                    |
| Neighborhood         | Anyone          | Child 5-18         | 0.0002175                  |
| Neighborhood         | Anyone          | Child 0-4          | 0.0000725                  |
| Community            | Anyone          | Adult 65+          | 0.0002175                  |
| Community            | Anyone          | Adult 19-64        | 0.000145                   |
| Community            | Anyone          | Child 5-18         | 0.0000544                  |
| Community            | Anyone          | Child 0-4          | 0.0000181                  |
