# Supplementary material
Source: PubMed Central journal article supplement (PMC1458676)
Supplement: pnas_0601266103_11.pdf [file pnas_0601266103_11.pdf]

**Table 4. Calibration of the pandemic influenza model parameters, for a transmission probability of 0.12**

| a)          | Current model |           | Age group      | Asian A (H2N2) 1957-8, % | Hong Kong A (H3N2) 1968-9, % |
|-------------|---------------|-----------|----------------|--------------------------|------------------------------|
|             | Community, %  | Nation, % |                |                          |                              |
| Overall     | 34            | 33        | Overall        | 33                       | 34                           |
| 0-4 years   | 35            | 35        | Young children | 35                       | 34                           |
| 5-18 years  | 48            | 50        | Older children | 62                       | 35                           |
| 19-29 years | 30            | 27        | Adults         | 24                       | 33                           |
| 30-64 years | 31            | 28        |                |                          |                              |
| >64 years   | 25            | 24        |                |                          |                              |

  

| b)                     | Infection source, % |       |
|------------------------|---------------------|-------|
| Household              | 38.5                | 38.9  |
| Household cluster      | 9.5                 | 9.1   |
| Small play group       | 0.7                 | 0.7   |
| Large day care         | 1.1                 | 1.1   |
| School                 | 19.6%               | 20.2% |
| Workgroup              | 12.6%               | 12.6% |
| Neighborhood/community | 18.1%               | 17.4% |

(a) Illness attack rate for different age groups, for our model and for the last two pandemic strains. (b) Sources of infection, according to our model. The values are given for an ensemble of 500 isolated 2,000-person communities with initially 12 randomly infected persons in each community, and for the national-scale model comprised of connected communities. For the latter, we use the ongoing daily introduction of new infecteds, as described elsewhere.
