# Supplementary material
Source: PubMed Central journal article supplement (PMC1458676)
Supplement: pnas_0601266103_12.pdf [file pnas_0601266103_12.pdf]

**Table 5. Long-distance trips per person, according to age group, and trip duration (1995 data, from [www.bts.gov/publications/national\\_transportation\\_statistics](http://www.bts.gov/publications/national_transportation_statistics))**

|                                   | Age group, years |       |       |      |
|-----------------------------------|------------------|-------|-------|------|
|                                   | <18              | 18-29 | 30-64 | 65+  |
| Share of person-trips             | 16.0%            | 17.2% | 57.7% | 9.3% |
| Share of population               | 29%              | 14%   | 45%   | 13%  |
| Annual number of trips per capita | 2.3              | 3.7   | 4.8   | 2.8  |

| Duration (number of nights) | 0    | 1-3  | 4-7  | 8+  |
|-----------------------------|------|------|------|-----|
| Share of trips, %           | 23.9 | 50.2 | 18.5 | 7.4 |

Within each trip duration range, we assume a uniform distribution, with a maximum of 11 nights.
