# Supplementary material
Source: PubMed Central journal article supplement (PMC1458676)
Supplement: pnas_0601266103_13.pdf [file pnas_0601266103_13.pdf]

**Table 6. Major international air hubs in the continental U.S. and the associated counties [with their federal information processing standards (FIPS) codes] that are each randomly infected each day**

|     | <b>City (airport)</b>  | <b>County (state)</b> | <b>International passengers (2004)</b> | <b>FIPS</b> |
|-----|------------------------|-----------------------|----------------------------------------|-------------|
| 1.  | New York (JFK)         | New York (NY)         | 16,335,845                             | 36061       |
| 2.  | Los Angeles (LAX)      | Los Angeles (CA)      | 15,361,082                             | 6037        |
| 3.  | Miami (MIA)            | Miami-Dade (FL)       | 14,098,628                             | 12086       |
| 4.  | Chicago (ORD)          | Cook (IL)             | 9,669,113                              | 17031       |
| 5.  | Newark (EWR)           | Hudson (NJ)           | 8,372,287                              | 34017       |
| 6.  | San Francisco (SFO)    | San Francisco (CA)    | 7,238,978                              | 6075        |
| 7.  | Atlanta (ATL)          | Fulton (GA)           | 6,477,051                              | 13121       |
| 8.  | Houston (IAH)          | Harris (TX)           | 5,895,128                              | 48201       |
| 9.  | Washington (IAD)       | Fairfax (VA)          | 4,359,695                              | 51059       |
| 10. | Dallas/Ft. Worth (DFW) | Dallas (TX)           | 4,200,910                              | 48113       |
| 11. | Boston (BOS)           | Suffolk (MA)          | 3,532,053                              | 25025       |
| 12. | Philadelphia (PHL)     | Delaware (PA)         | 3,484,172                              | 42045       |
| 13. | Detroit (DTW)          | Wayne (MI)            | 3,280,026                              | 26163       |
| 14. | Seattle (SEA)          | King (WA)             | 2,251,008                              | 53033       |

International passengers denotes the total number of arriving and departing international passengers.
