# Supplementary material
Source: PubMed Central journal article supplement (PMC1458676)
Supplement: pnas_0601266103_14.pdf [file pnas_0601266103_14.pdf]

**Table 7.  $R_0$  for different transmission probabilities, calculated by three different methods, as described in the text, and for the index cases coming from different age groups as used in the “Attack rate pattern weighted index case” method**

| <b>Transmission probability</b> | <b>Community level</b>   |                                                | <b>National level</b>                      |
|---------------------------------|--------------------------|------------------------------------------------|--------------------------------------------|
|                                 | <b>Random index case</b> | <b>Attack rate pattern weighted index case</b> | <b>Slope of cumulative number of cases</b> |
| 0.09                            | 1.08                     | 1.21                                           |                                            |
| 0.12                            | 1.42                     | 1.54                                           | 1.60                                       |
| 0.15                            | 1.77                     | 1.86                                           | 1.91                                       |
| 0.17                            | 1.99                     | 2.07                                           | 2.11                                       |
| 0.20                            | 2.31                     | 2.37                                           | 2.39                                       |

| <b>Transmission probability</b> | <b>Community level, age (in years)</b> |             |              |              |               |
|---------------------------------|----------------------------------------|-------------|--------------|--------------|---------------|
|                                 | <b>0-4</b>                             | <b>5-18</b> | <b>18-29</b> | <b>30-64</b> | <b>&gt;64</b> |
| 0.09                            | 1.19                                   | 1.71        | 0.90         | 0.96         | 0.61          |
| 0.12                            | 1.57                                   | 2.25        | 1.20         | 1.26         | 0.80          |
| 0.15                            | 1.93                                   | 2.79        | 1.49         | 1.56         | 1.00          |
| 0.17                            | 2.17                                   | 3.14        | 1.67         | 1.75         | 1.12          |
| 0.20                            | 2.52                                   | 3.65        | 1.95         | 2.05         | 1.12          |
