# Supplementary material
Source: PubMed Central journal article supplement (PMC1458676)
Supplement: pnas_0601266103_15.pdf [file pnas_0601266103_15.pdf]

**Table 8. Sensitivity to details of timing for medical interventions (vaccines or antivirals)**

| Production rate (doses per week):                | 4 M   | 10 M  |       | 20 M |       |       |           |
|--------------------------------------------------|-------|-------|-------|------|-------|-------|-----------|
| Production limit (total doses):                  | 100 M | 100 M | 250 M | 50 M | 100 M | 250 M | 400 M     |
| 0 days, one dose per person, entire population   | 19.2  | 5.9   | 0.7   | 23.5 | 3.0   | 0.03  | 0.03 0.01 |
| children-first policy                            | 2.9   | 0.07  | 0.04  | 2.5  | 0.02  | 0.01  |           |
| 30 days, one dose per person, entire population  | 23.6  | 12.3  | 6.5   | 23.6 | 7.6   | 0.5   | 0.5       |
| children-first policy                            | 12.3  | 0.9   | 0.6   | 5.5  | 0.2   | 0.1   | 0.1       |
| 30 days, two doses per person, entire population | 25.5  | 18.1  | 12.3  | 25.6 | 16.1  | 1.4   | 1.3       |
| children-first policy                            | 17.7  | 2.8   | 1.9   | 15.5 | 0.7   | 0.2   | 0.2       |
| 60 days, two doses per person, entire population | 28.2  | 21.4  | 20.8  | 26.0 | 18.6  | 10.0  | 10.0 3.4  |
| children-first policy                            | 24.5  | 11.6  | 10.4  | 18.8 | 5.3   | 3.4   |           |

| Intervention                                    | $R_0 = 1.6$     | $R_0 = 1.9$    | $R_0 = 2.1$     | $R_0 = 2.4$     |
|-------------------------------------------------|-----------------|----------------|-----------------|-----------------|
| Baseline (no intervention)                      | 32.6            | 43.5           | 48.5            | 53.7            |
| 1-day diagnosis delay                           | 0.04<br>(2.0 M) | 0.6<br>(39 M)  | 5.1<br>(300 M)  | 13.5<br>(600 M) |
| 2-day diagnosis delay                           | 0.07<br>(4.0 M) | 3.7<br>(212 M) | 10.6<br>(496 M) | 17.4<br>(641 M) |
| 1-day diagnosis delay, with 50% false positives | 0.04<br>(4.3 M) | 0.5<br>(74 M)  | 3.5<br>(425 M)  | 9.9<br>(887 M)  |

(Top) Simulated mean number of cases (cumulative incidence per 100) for  $R_0 = 1.6$ , assuming different vaccine production rates, start dates (relative to the initial introduction of infecteds), and total production limits. (Bottom) Simulated mean number of cases (cumulative incidence per 100) and antiviral courses required (in parentheses), for 80% TAP with an unlimited supply initiated 10 days after the pandemic alert threshold, for different values of  $R_0$ . M, million.
