# Supplementary material
Source: PubMed Central journal article supplement (PMC1458676)
Supplement: pnas_0601266103_16.pdf [file pnas_0601266103_16.pdf]

**Table 9. Various intervention runs aimed at examining the sensitivity of results presented in Table 2**

| Intervention                                                                                         | $R_0 = 1.6$     | $R_0 = 1.9$     | $R_0 = 2.1$     | $R_0 = 2.4$     |
|------------------------------------------------------------------------------------------------------|-----------------|-----------------|-----------------|-----------------|
| <b>Targeted antiviral prophylaxis</b>                                                                |                 |                 |                 |                 |
| 60% TAP, 7 days after pandemic alert, unlimited antiviral supply (number of courses used)            | 0.06<br>(2.8 M) | 4.3<br>(182 M)  | 12.2<br>(418 M) | 19.3<br>(530 M) |
| 60% TAP (household only), 7 days after alert, unlimited antiviral supply (number of courses used)    | 3.7<br>(23 M)   | 23.6<br>(132 M) | 29.2<br>(154 M) | 35.4<br>(175 M) |
| 80% TAP, 7 days after alert, unlimited antiviral supply (number of courses used)                     | 0.03<br>(1.6 M) | 0.4<br>(27 M)   | 4.4<br>(262 M)  | 13.3<br>(595 M) |
| 80% TAP, 10 days after alert, unlimited antiviral supply (number of courses used)                    | 0.04<br>(2.0 M) | 0.6<br>(40 M)   | 5.1<br>(300 M)  | 13.5<br>(600 M) |
| <b>Travel restrictions and other social distancing measures</b>                                      |                 |                 |                 |                 |
| Reduction in long-range travel, to 1% of the normal frequency, during the entire 180-day simulation  | 27.4            | 44.0            | 48.9            | 54.0            |
| School closure and local social distancing, starting 7 days after alert                              | 0.1             | 8.7             | 29.3            | 41.0            |
| Local social distancing and 50% cut in long-distance travel, 7 days after alert                      | 23.6            | 39.3            | 44.7            | 50.4            |
| School closure, local social distancing, and 90% reduction in travel, all starting 1 day after alert | 0.07            | 3.8             | 22.4            | 40.6            |

Shown are the mean number of cases (cumulative incidence per 100) and antiviral courses required for various interventions and different values of  $R_0$ . M, million.
