# Supplementary material
Source: PubMed Central journal article supplement (PMC1458676)
Supplement: pnas_0601266103_19.pdf [file pnas_0601266103_19.pdf]

**Table 10. Simulated mean number of cases (cumulative incidence per 100) and antiviral courses required for various  $R_0$  and combinations of mitigation strategies**

| A                                           | B | C | D | Intervention                                                                                                                                                                                    | $R_0 = 1.9$     | $R_0 = 2.1$     | $R_0 = 2.4$     |
|---------------------------------------------|---|---|---|-------------------------------------------------------------------------------------------------------------------------------------------------------------------------------------------------|-----------------|-----------------|-----------------|
| Strategy combinations without vaccination   |   |   |   |                                                                                                                                                                                                 |                 |                 |                 |
|                                             |   | X | X | (I): School closure and local social distancing, starting 7 days after pandemic alert                                                                                                           | 8.7             | 29.3            | 41.0            |
| X                                           |   | X | X | Same as (I), also with 80% TAP starting 1 day after pandemic alert (no. courses)                                                                                                                | 0.02<br>(0.7 M) | 0.03<br>(1.1 M) | 0.1<br>(3.3 M)  |
| X                                           |   | X | X | Same as (I), but TAP starting at day 7 and school closure, social distancing at day 14                                                                                                          | 0.05<br>(1.5 M) | 0.09<br>(3.0 M) | 0.3<br>(11 M)   |
| X                                           |   | X |   | 80% TAP, 1 day after pandemic alert (no. courses) + social distancing and 90% cut in travel, 7 days after pandemic alert                                                                        | 0.04<br>(2.5 M) | 0.1<br>(10 M)   | 48.9<br>(20 M)* |
| Strategy combinations including vaccination |   |   |   |                                                                                                                                                                                                 |                 |                 |                 |
|                                             |   | X | X | (II): Low efficacy vaccine, uniform distribution 10 M per week up to 250 M, starting at day 0 + social distancing and 90% cut in travel 7 days after alert + school closure 14 days after alert | 0.2             | 0.6             | 4.5             |
|                                             | X | X | X | Same as (II), but children-first policy                                                                                                                                                         | 0.2             | 0.9             | 7.7             |
| X                                           | X | X | X | Same as (II), also with 80% TAP 7 days after pandemic alert                                                                                                                                     | 0.03<br>(0.9 M) | 0.05<br>(1.6 M) | 0.09<br>(3.1 M) |
|                                             | X | X | X | High efficacy vaccine: 1 M per day, at pandemic alert + 80% TAP, at pandemic alert + 10 days (no. courses) + school closure and social distancing, at 14 days                                   | 0.05<br>(1.6 M) | 0.1<br>(3.0 M)  | 0.2<br>(7.6 M)  |

A, TAP; B, vaccination; C, school closure; D, social distancing measures. M, million.

\*Exhausted the available supply of 20 million antiviral courses.
