# Supplementary material
Source: PubMed Central journal article supplement (PMC1458676)

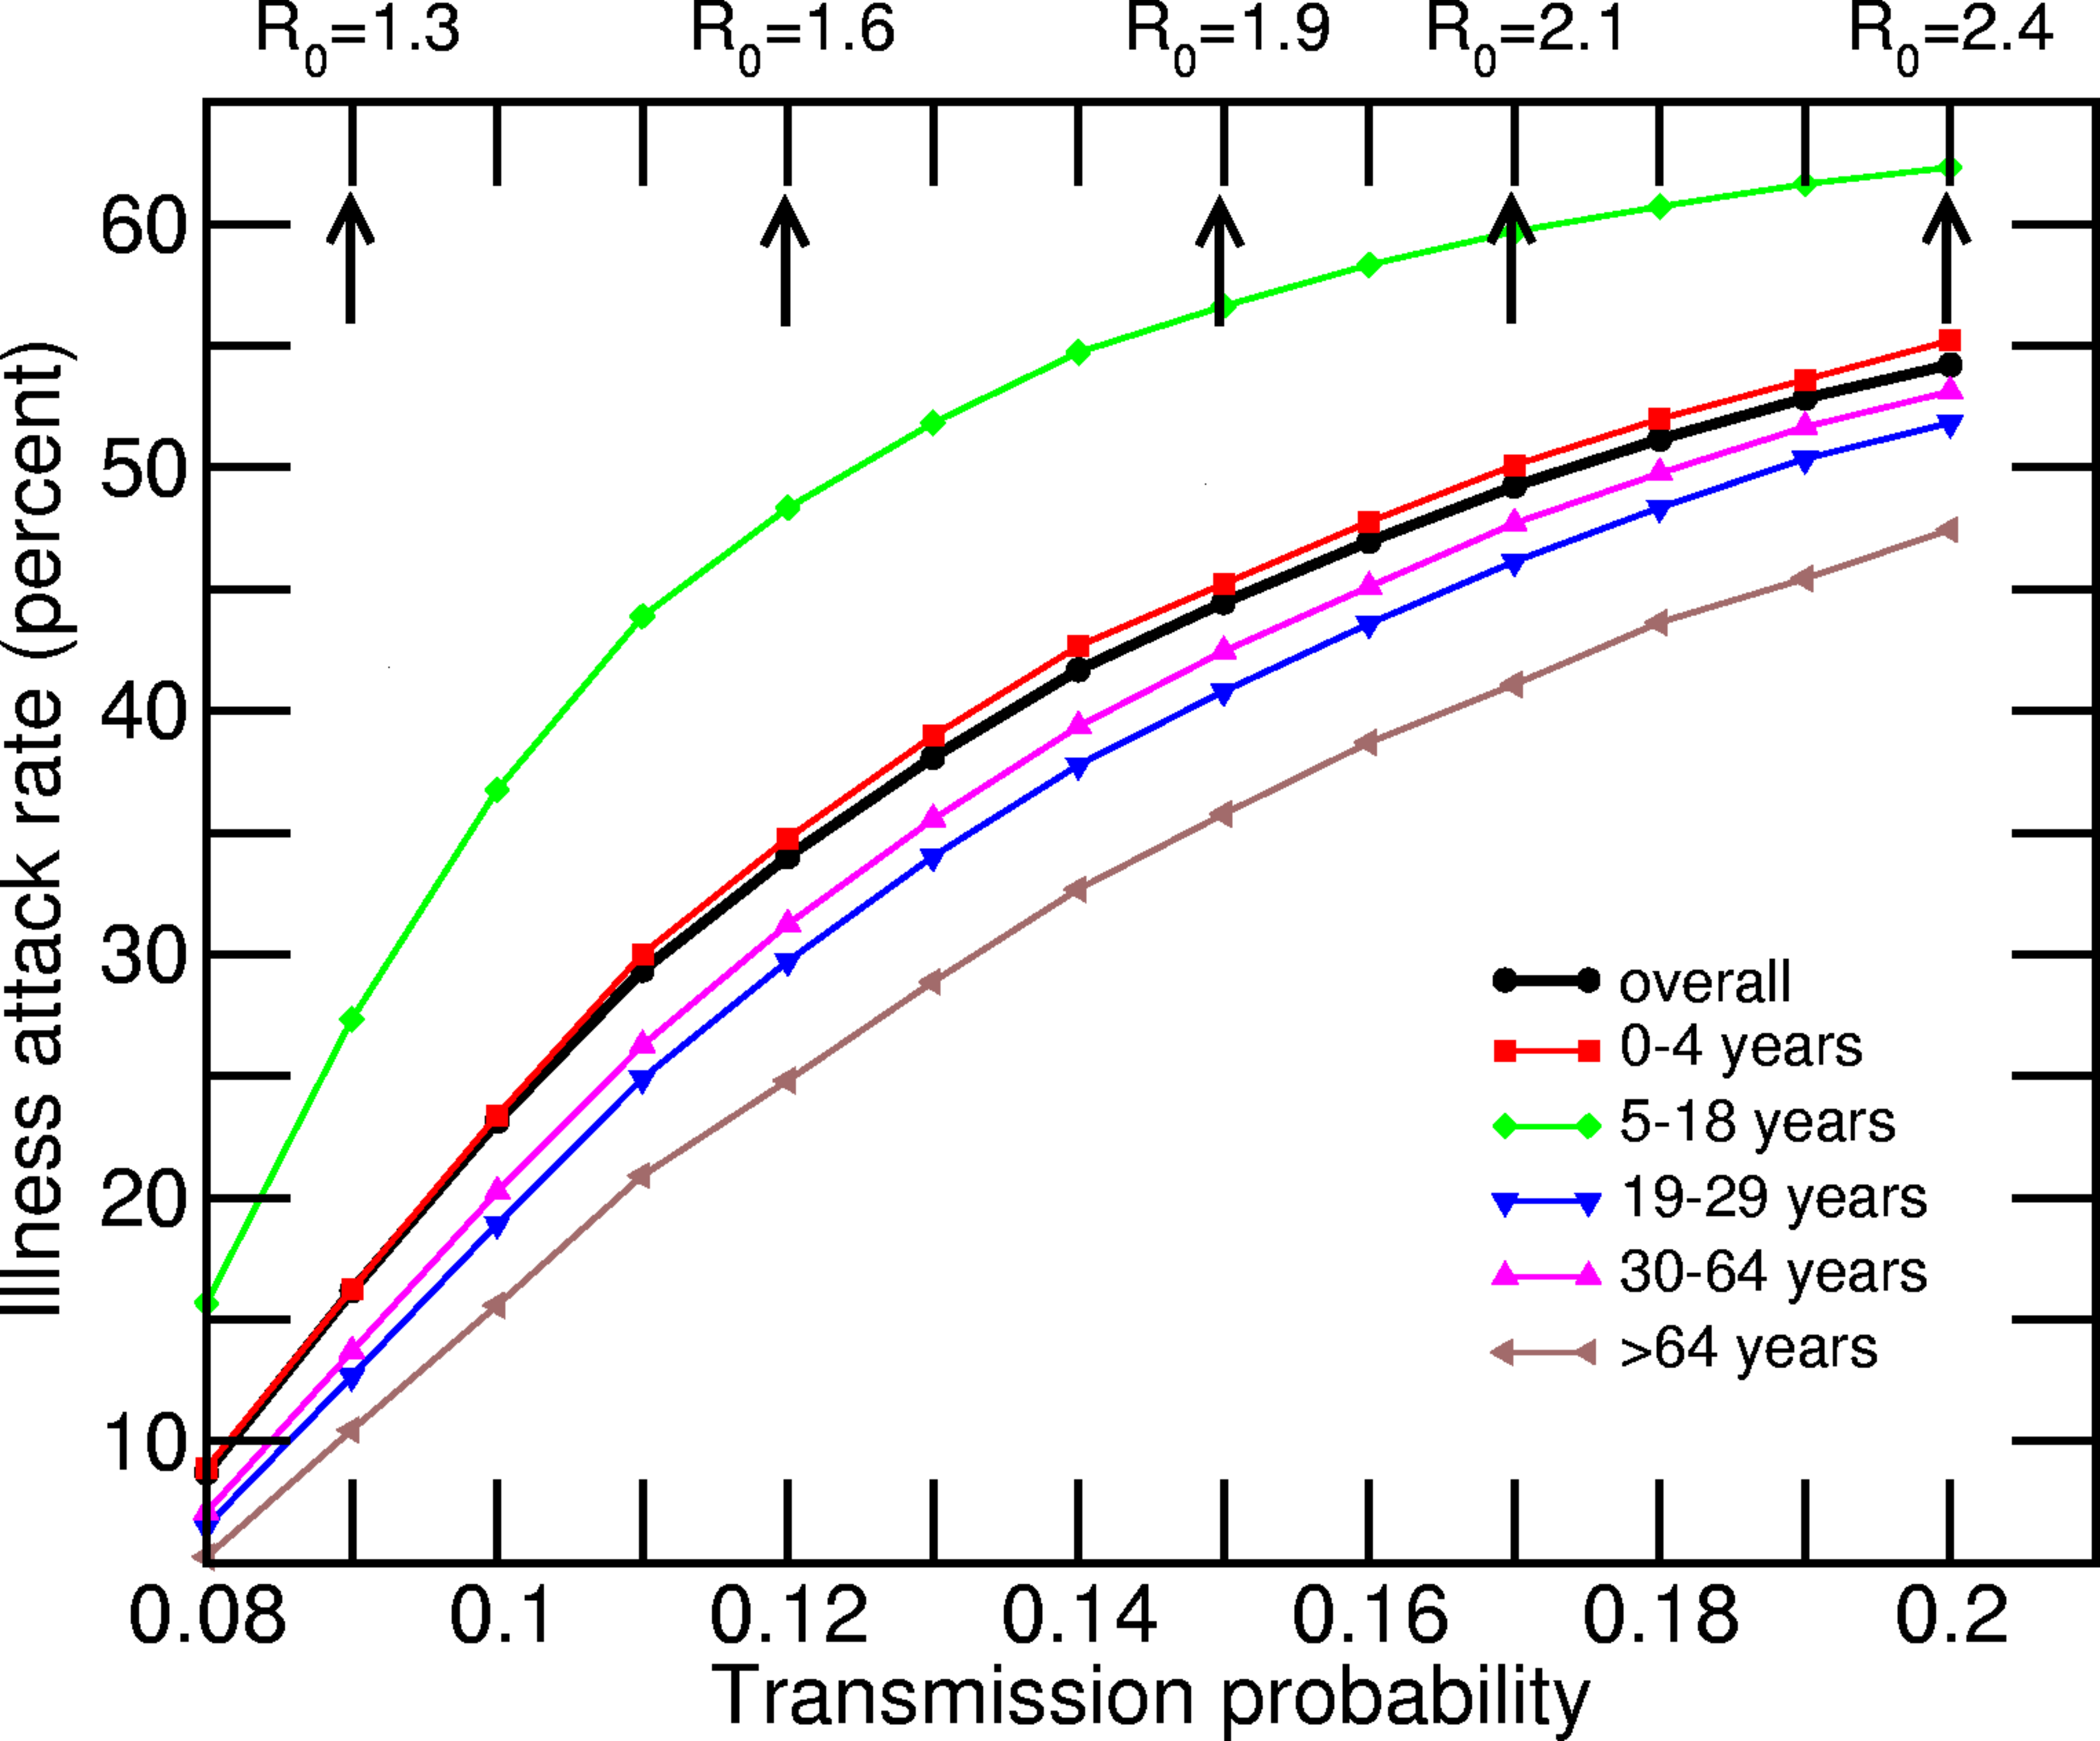

Supplement: pnas_0601266103_2.pdf [file pnas_0601266103_2.pdf]

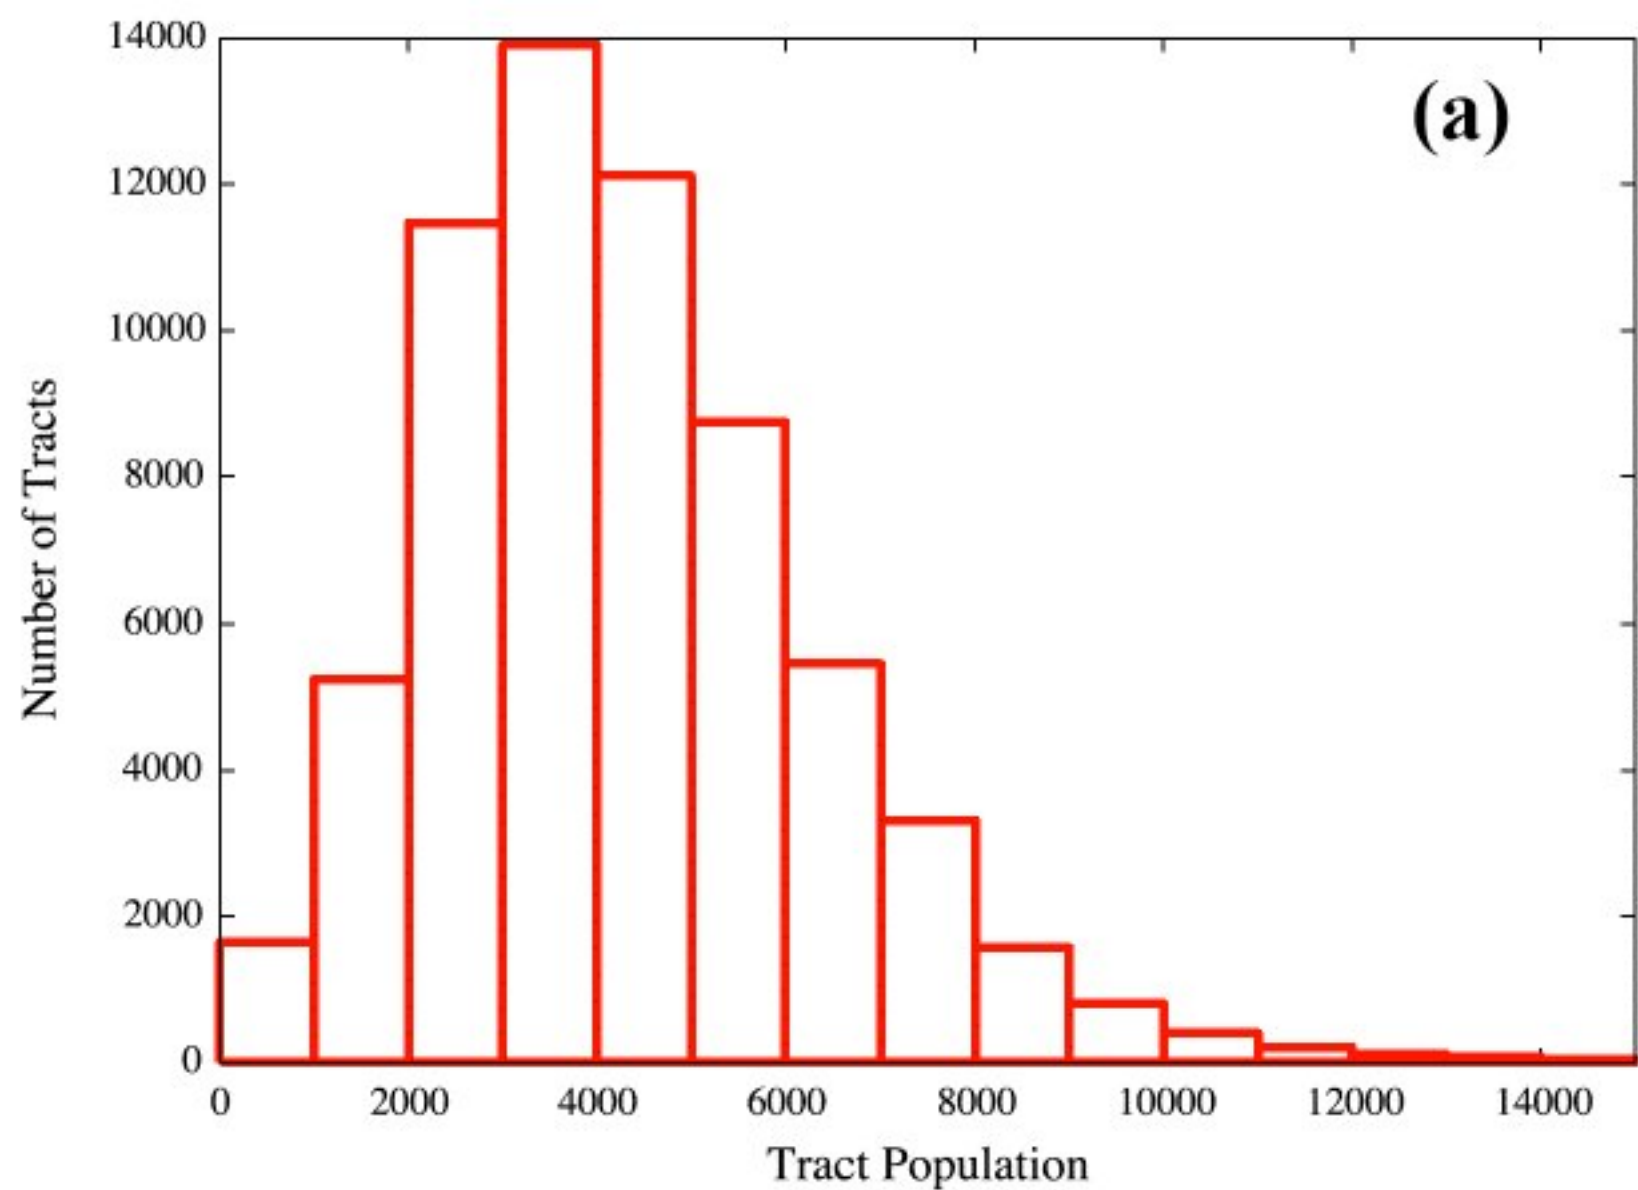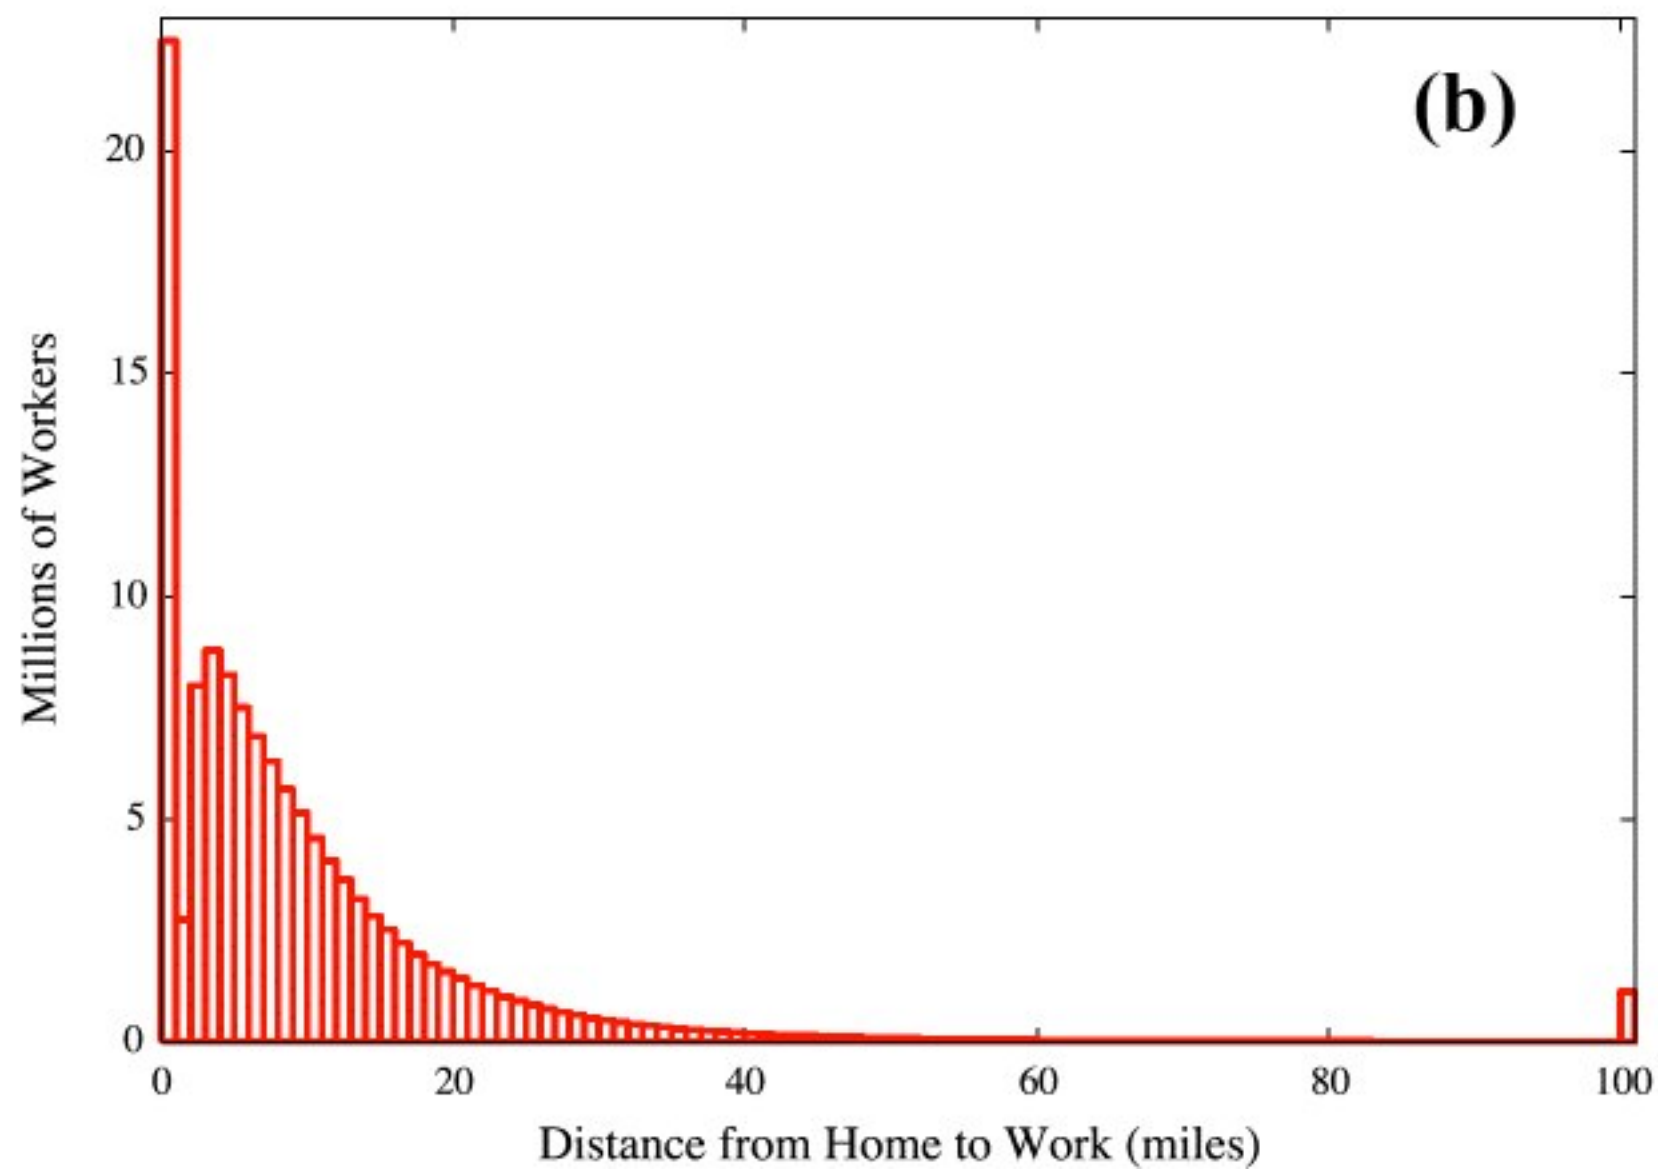

Supplement: pnas_0601266103_3.pdf [file pnas_0601266103_3.pdf]

Fraction of Realizations

$R_0 = 1.77$

$10^{-1}$   
 $10^{-2}$   
 $10^{-3}$   
 $10^{-4}$   
 $10^{-5}$

0 2 4 6 8 10 12 14 16 18

Number of secondary cases

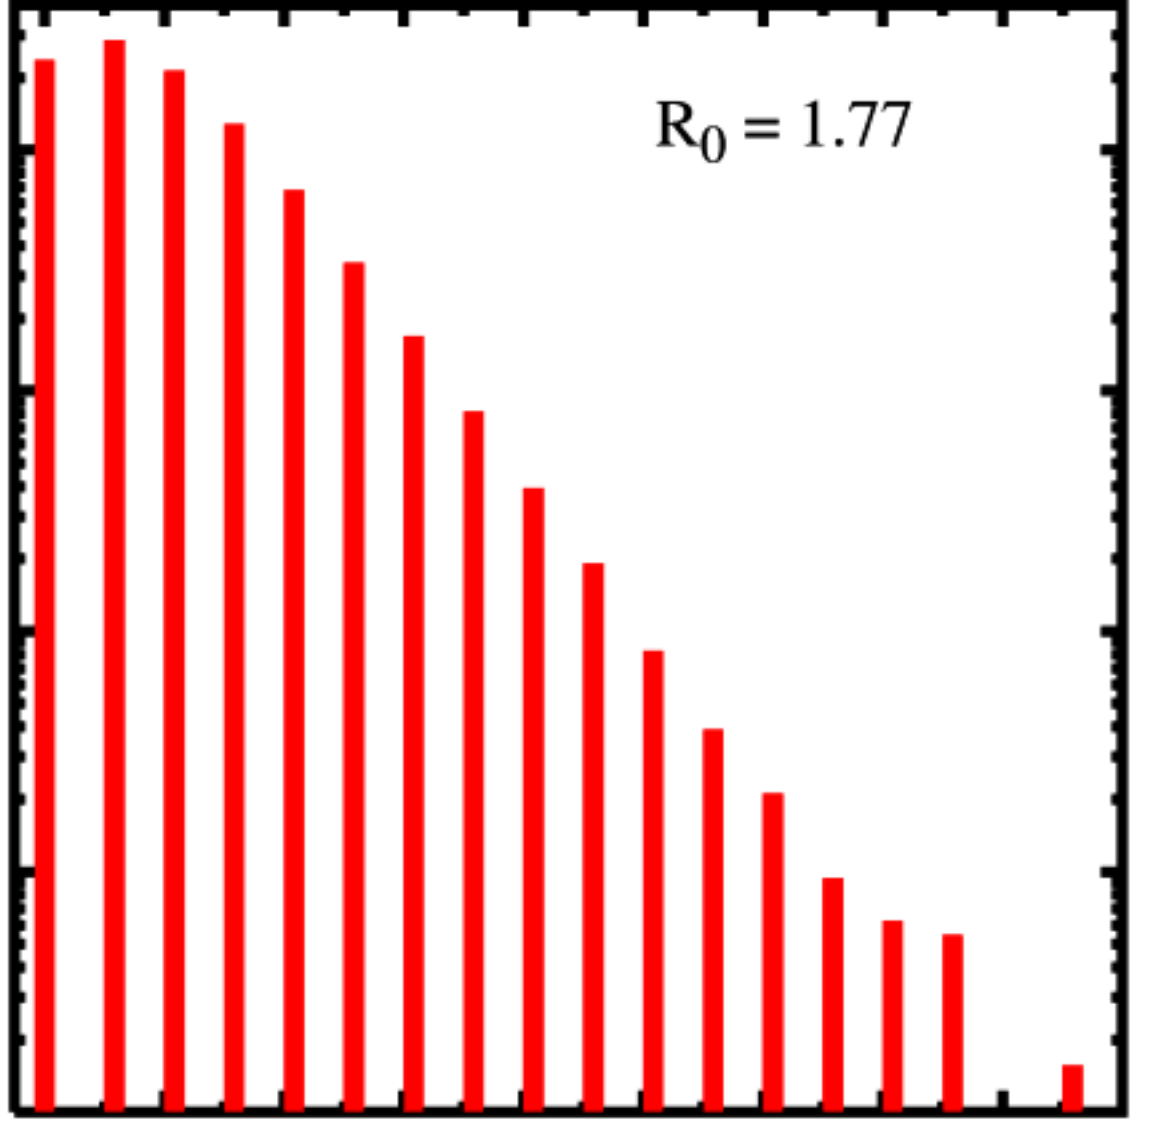

Supplement: pnas_0601266103_4.pdf [file pnas_0601266103_4.pdf]

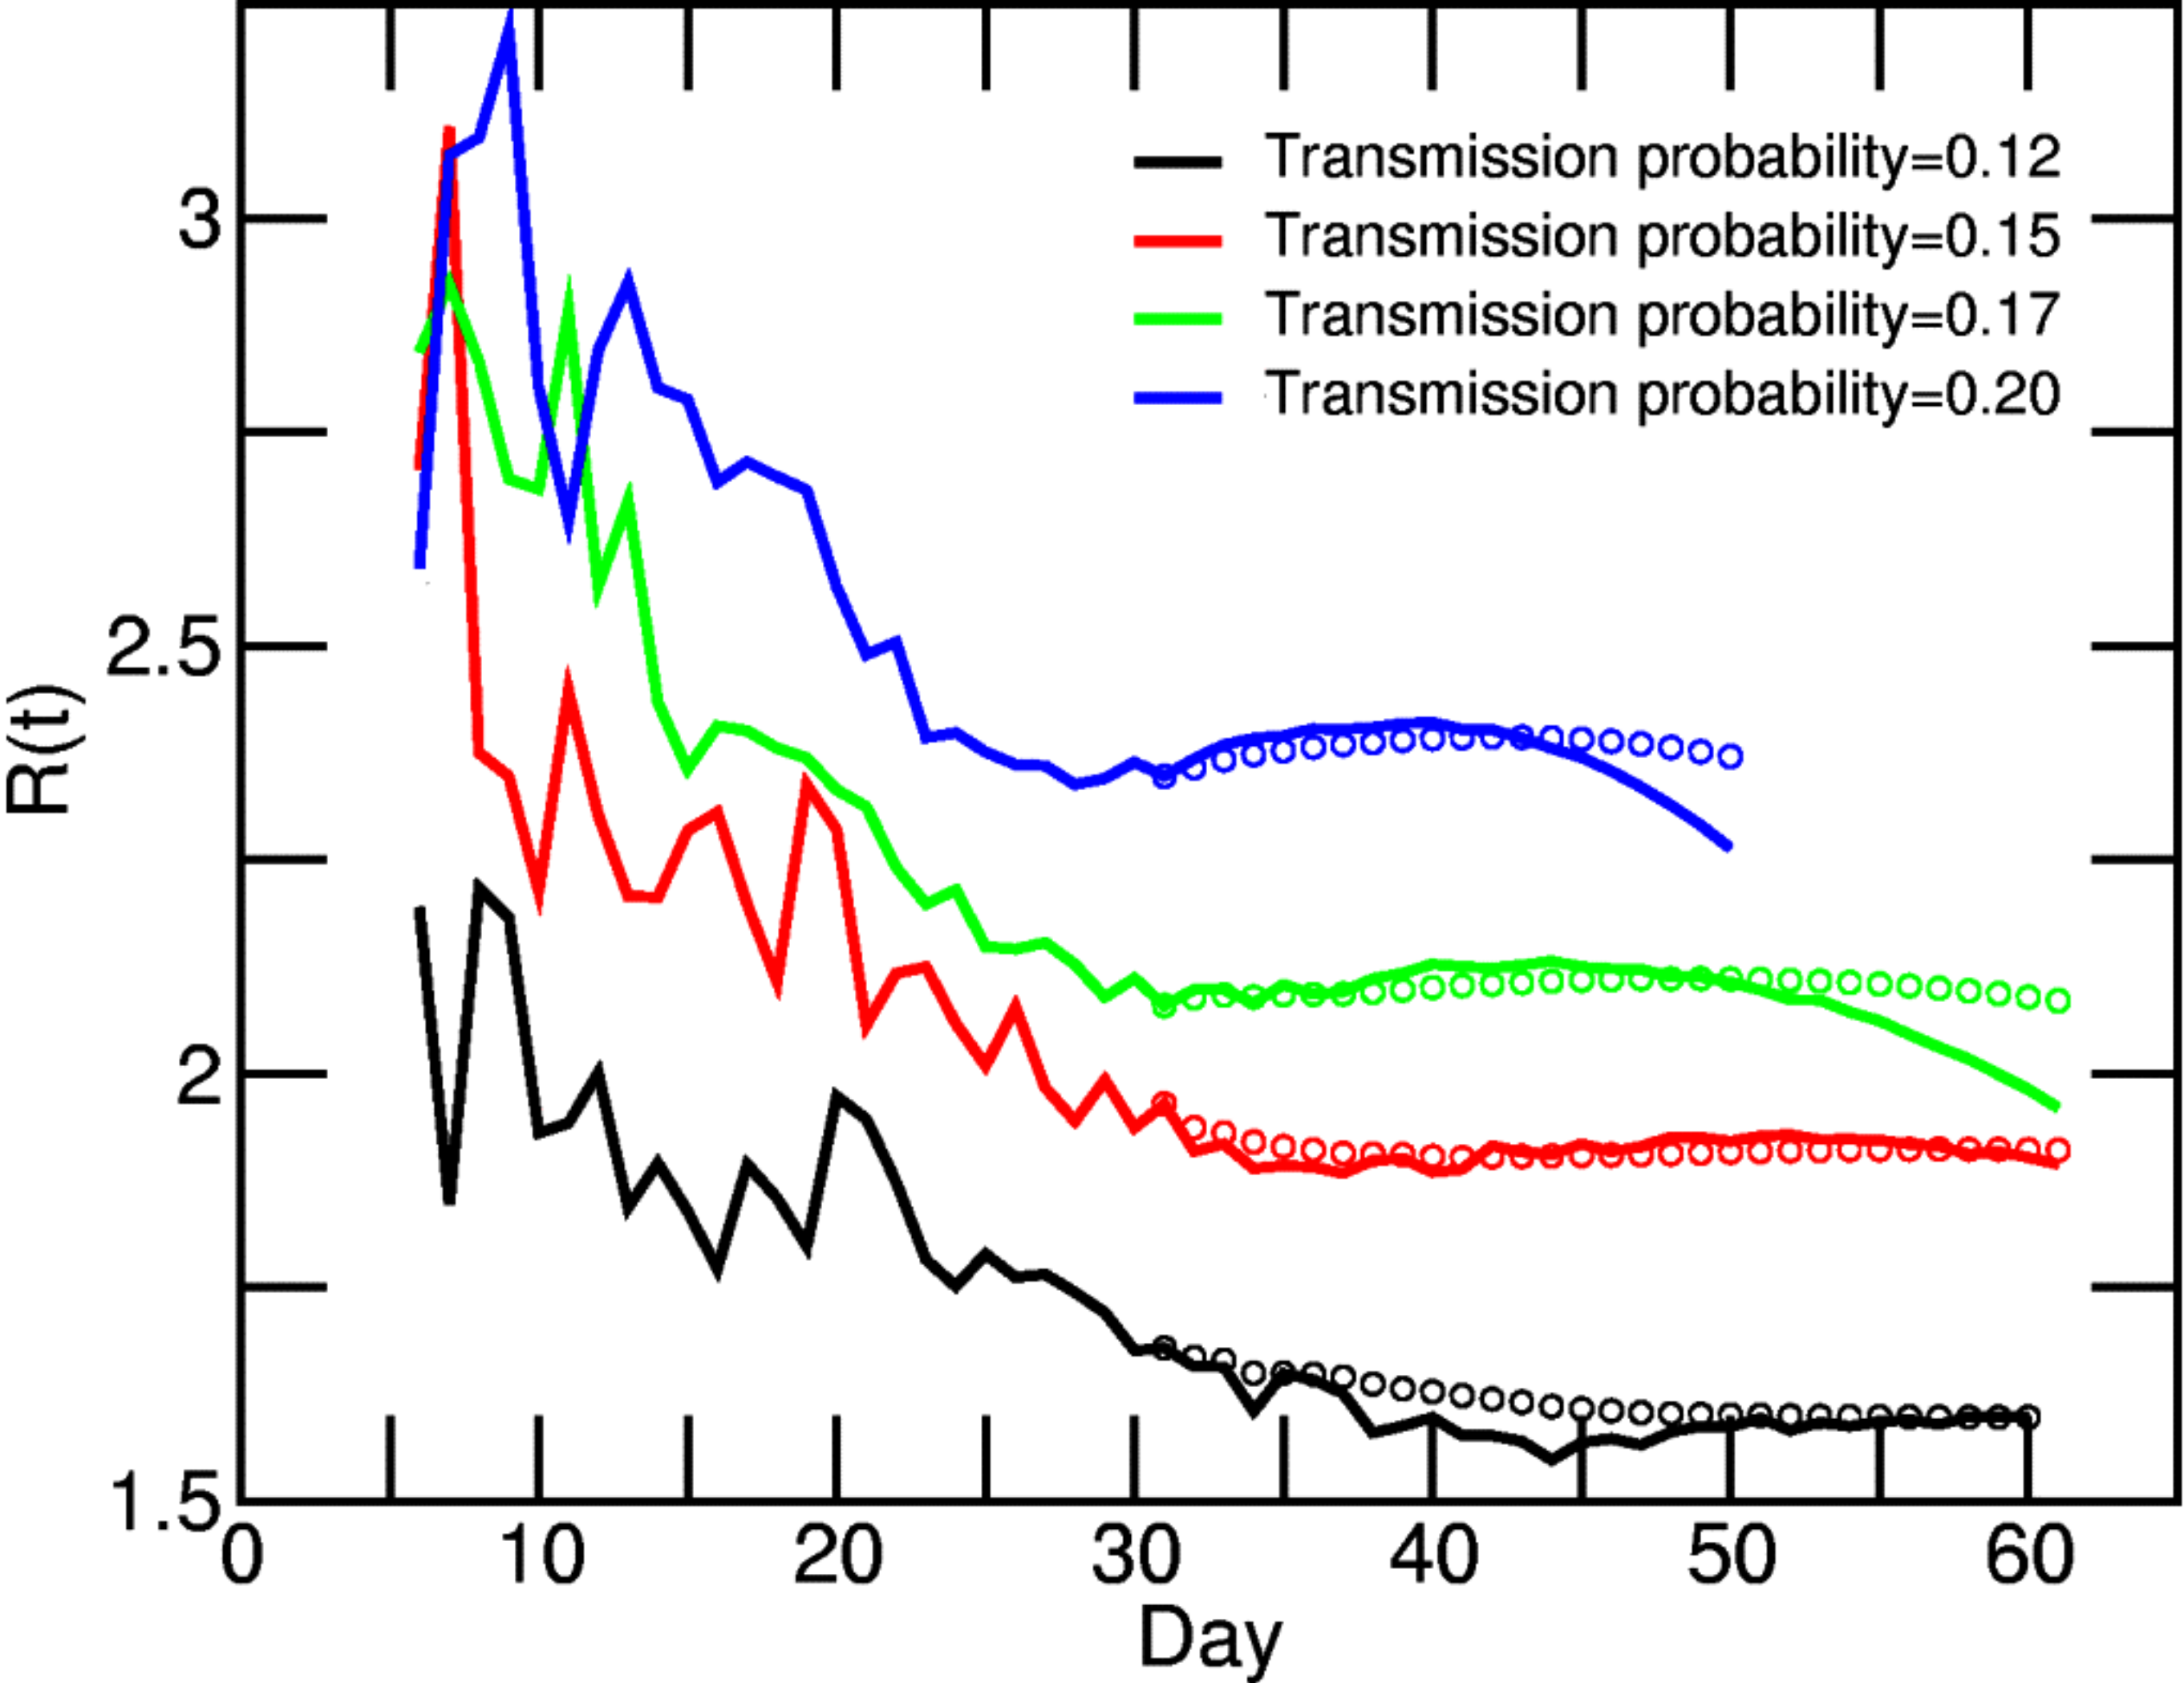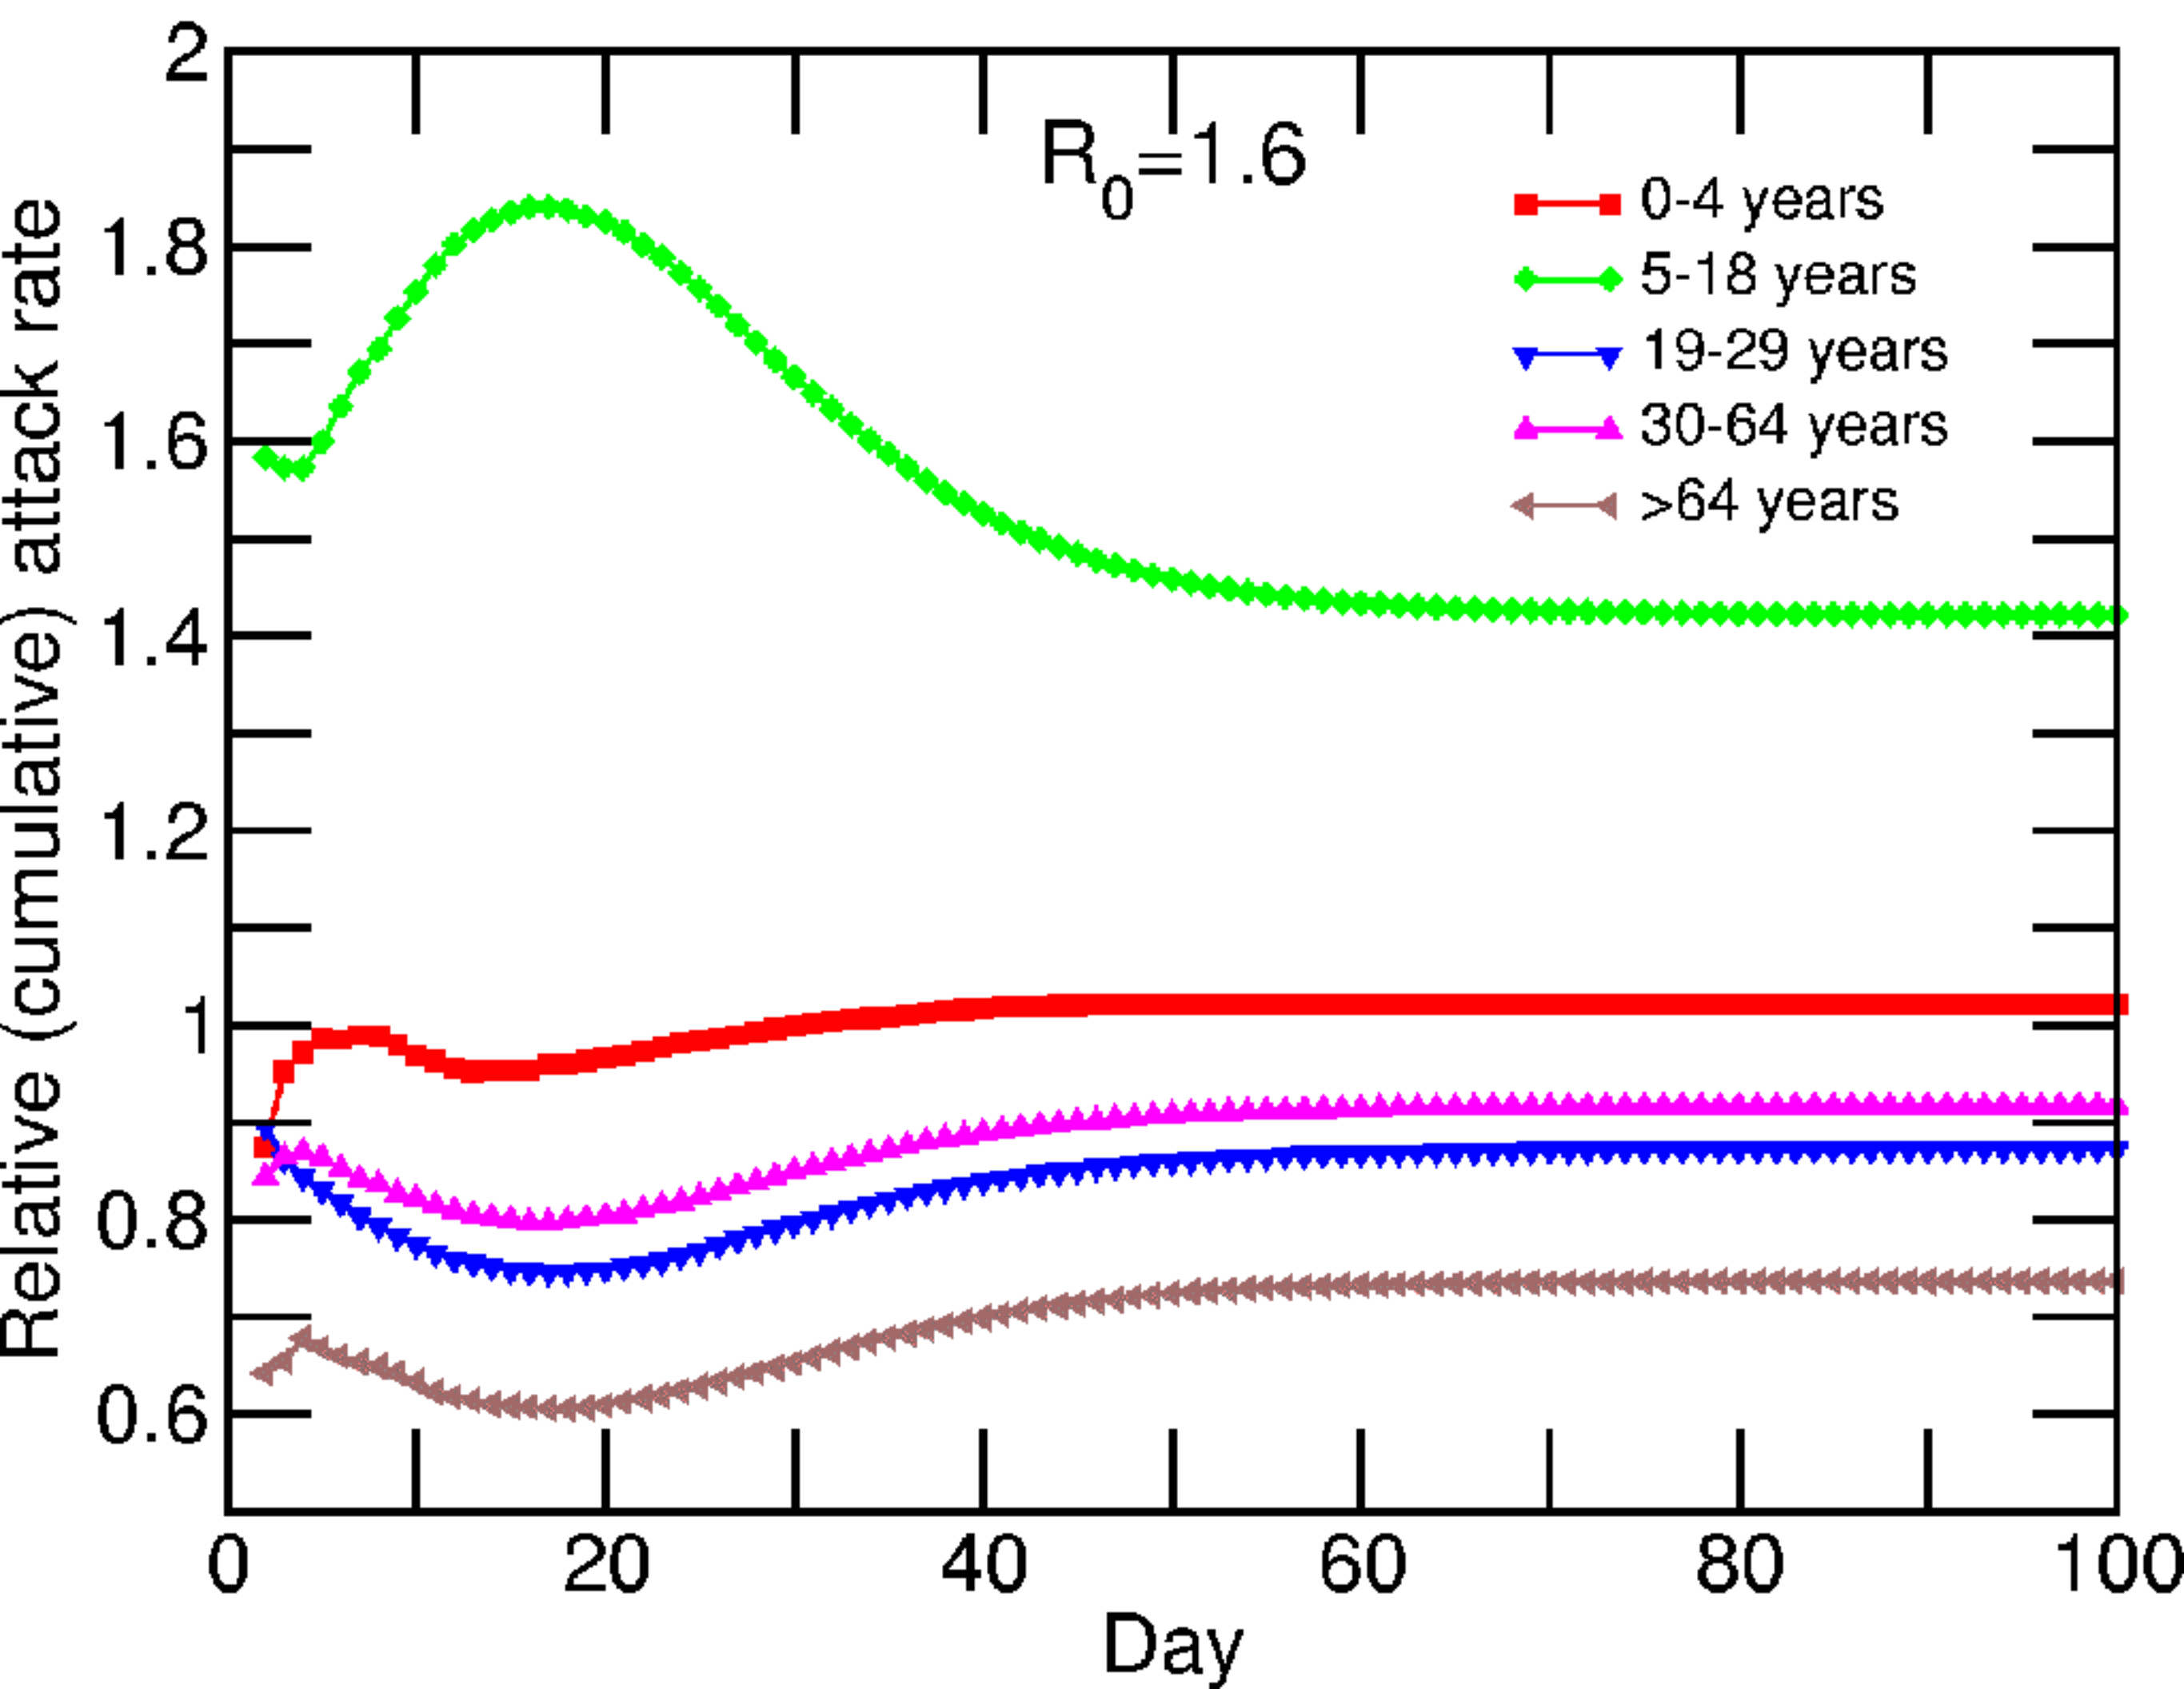

Supplement: pnas_0601266103_5.pdf [file pnas_0601266103_5.pdf]

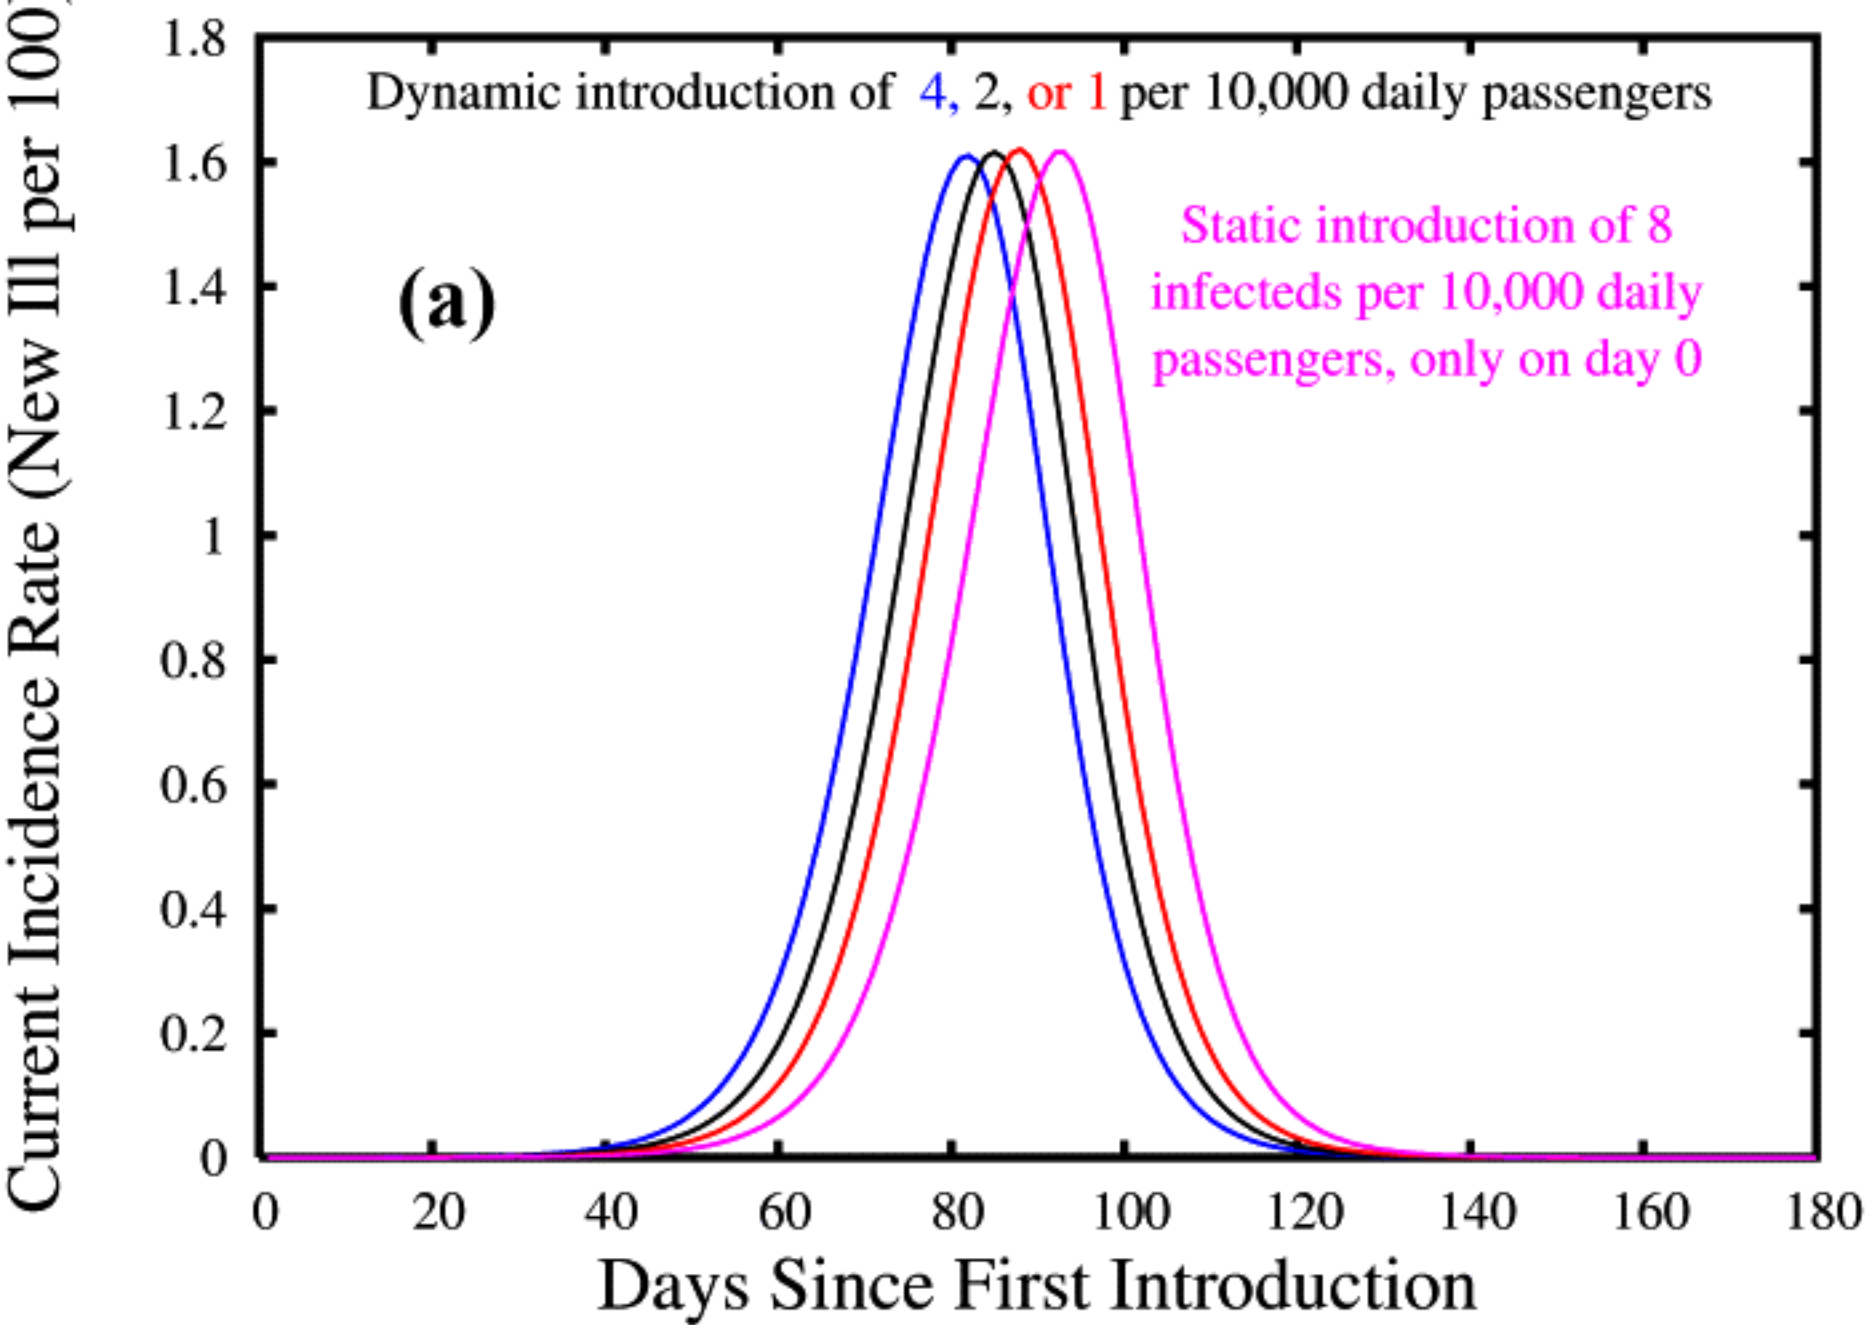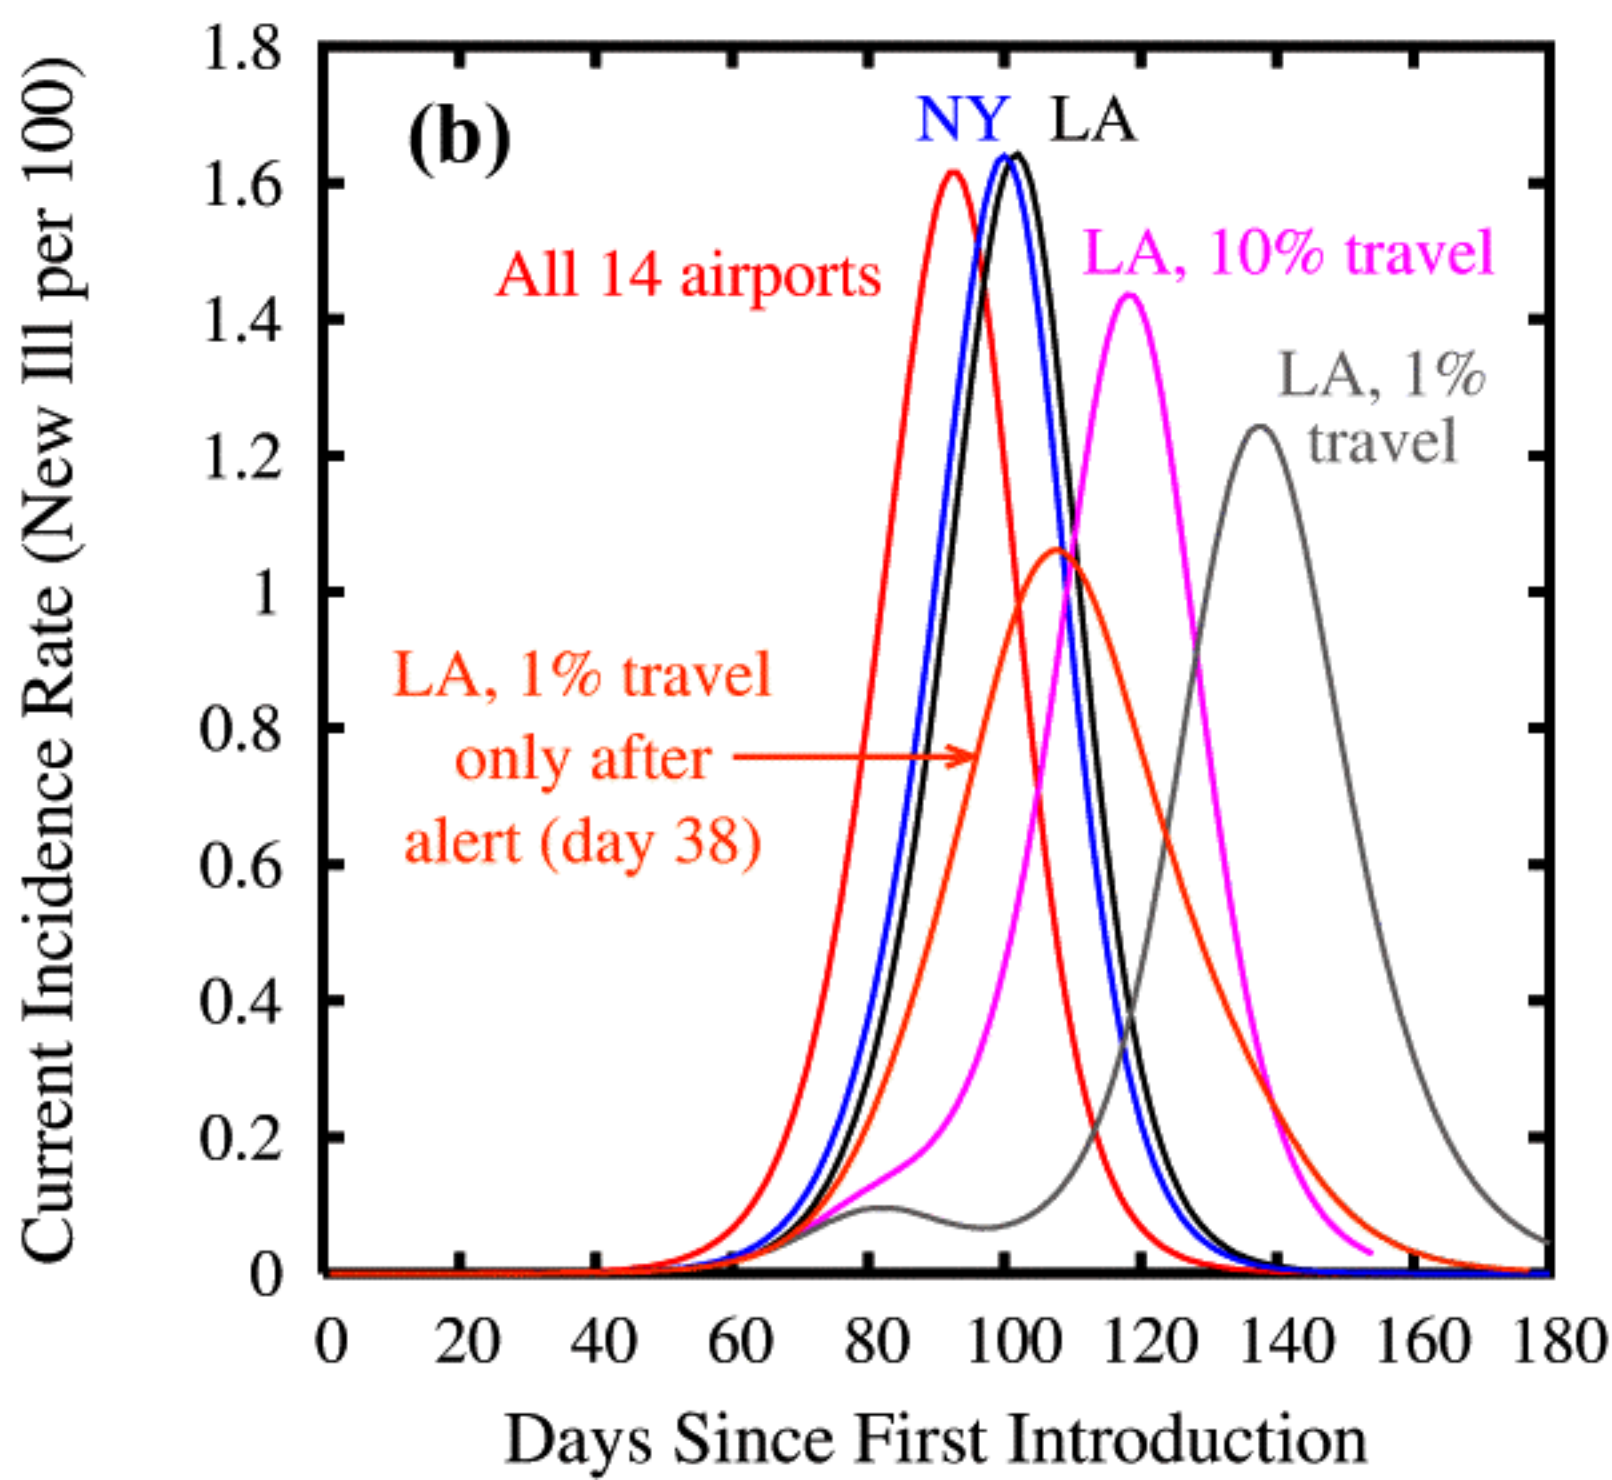

Supplement: pnas_0601266103_6.pdf [file pnas_0601266103_6.pdf]

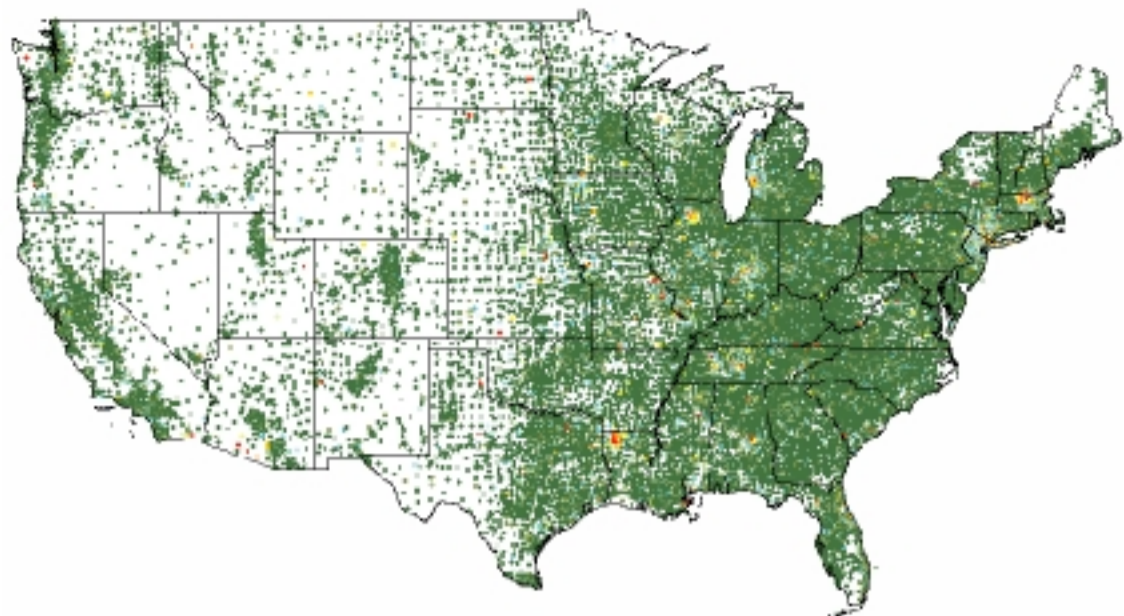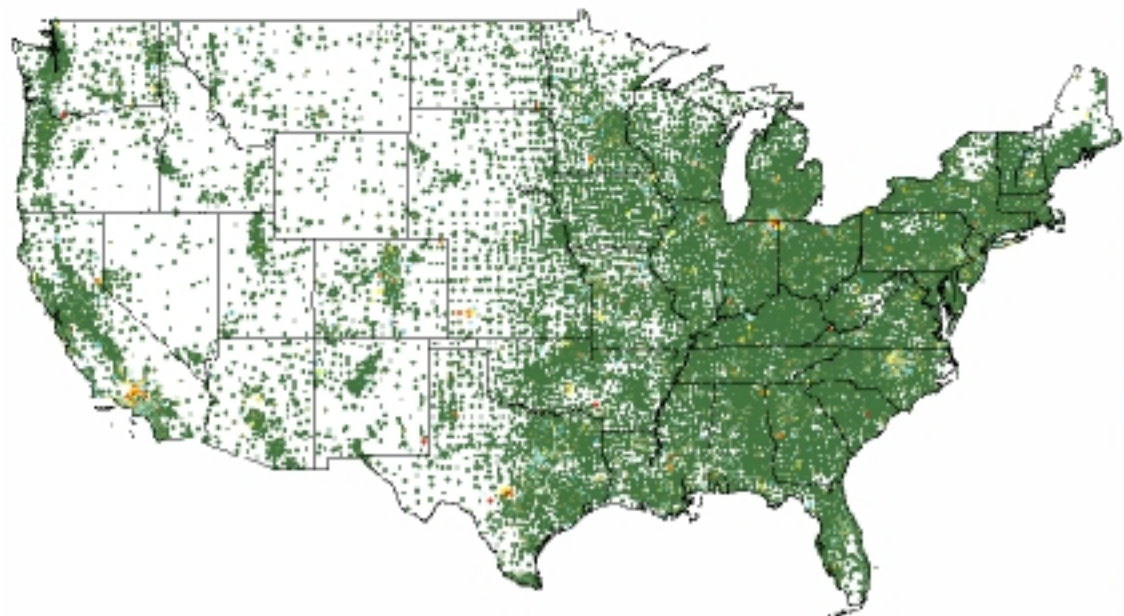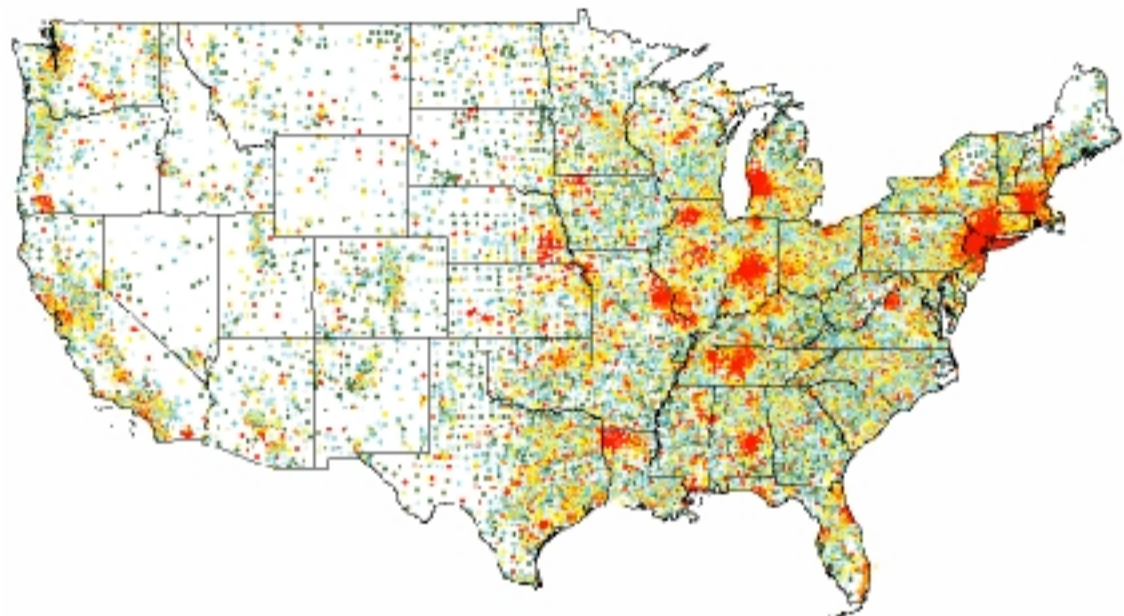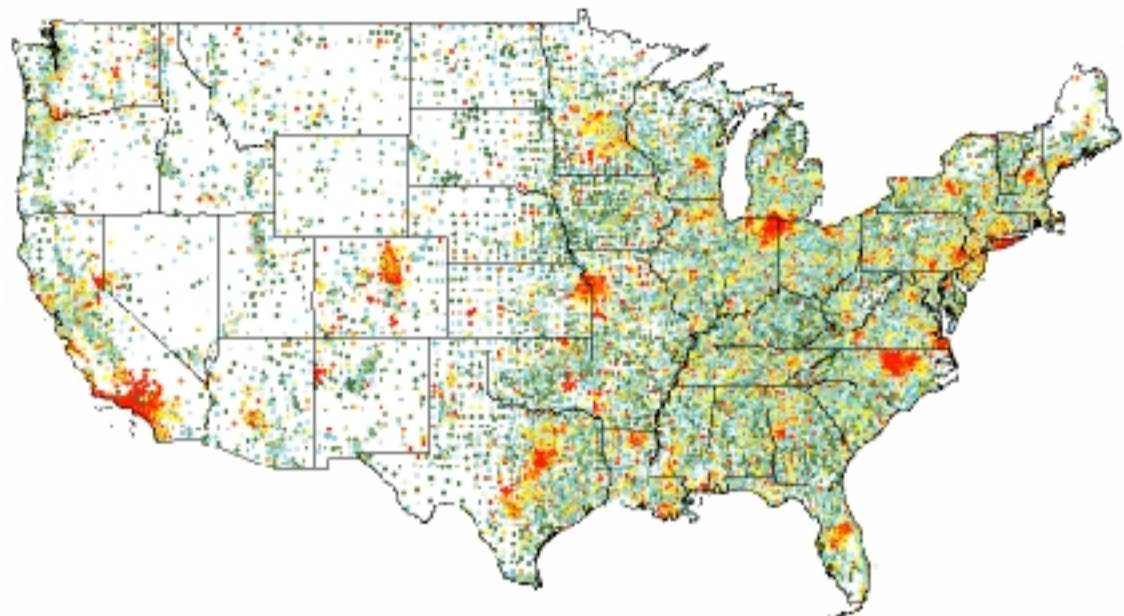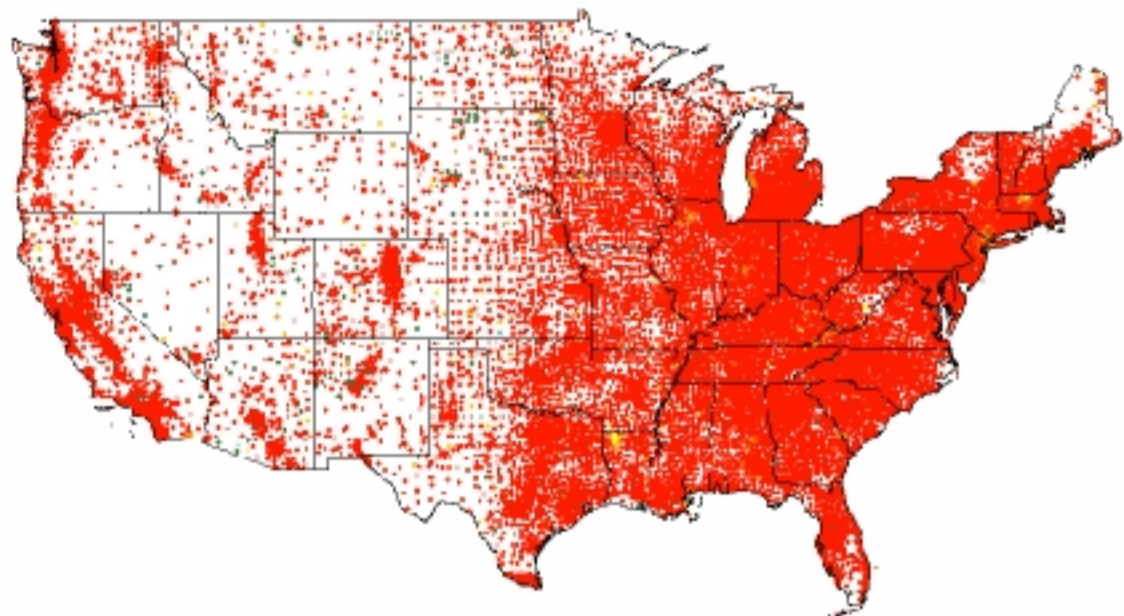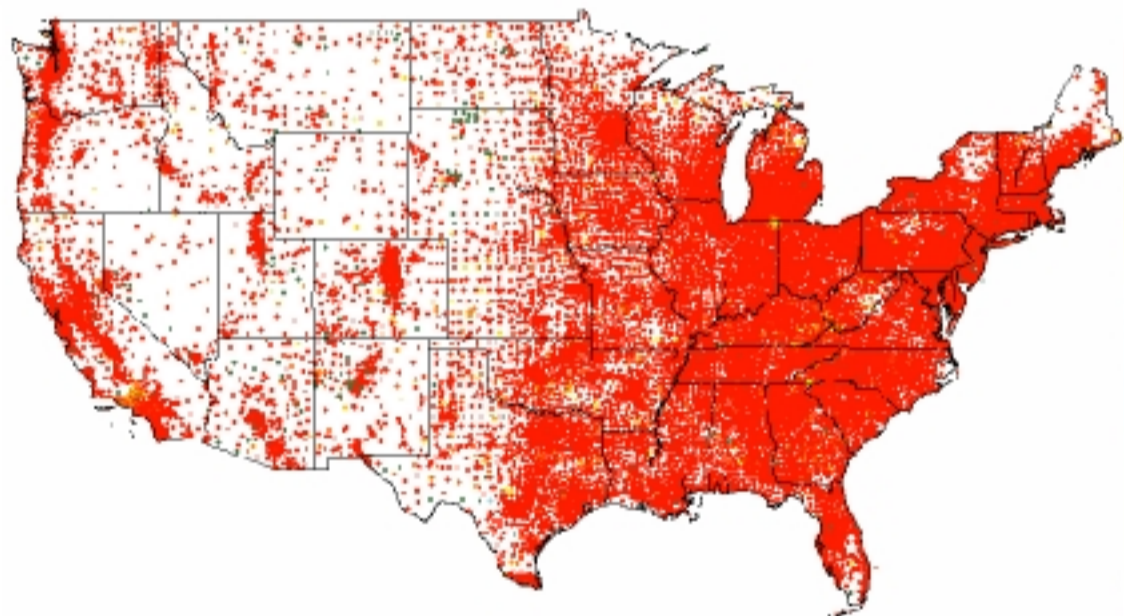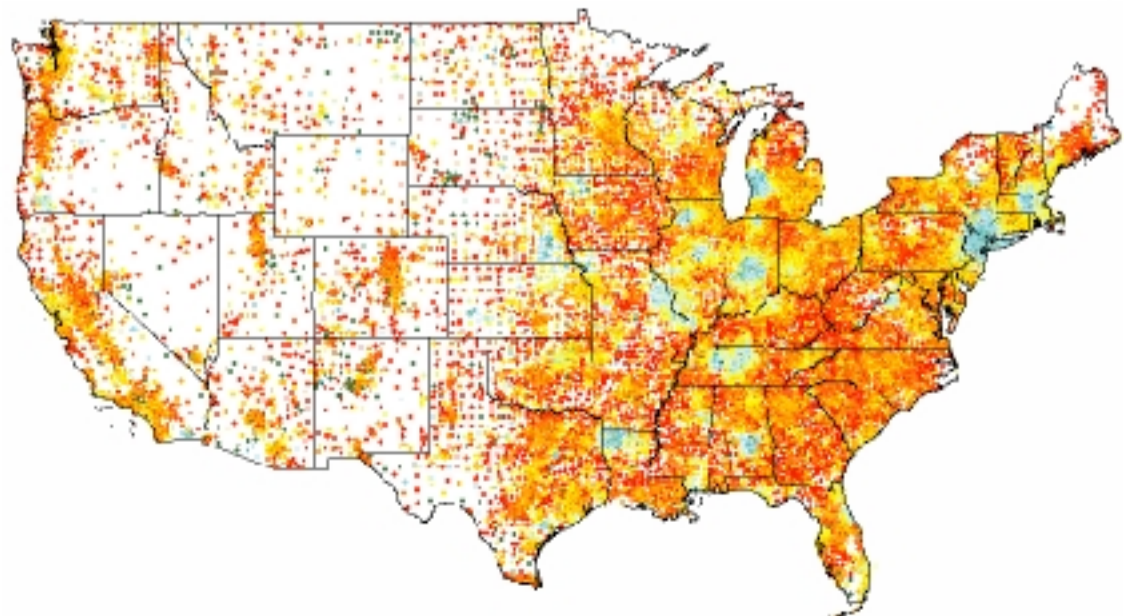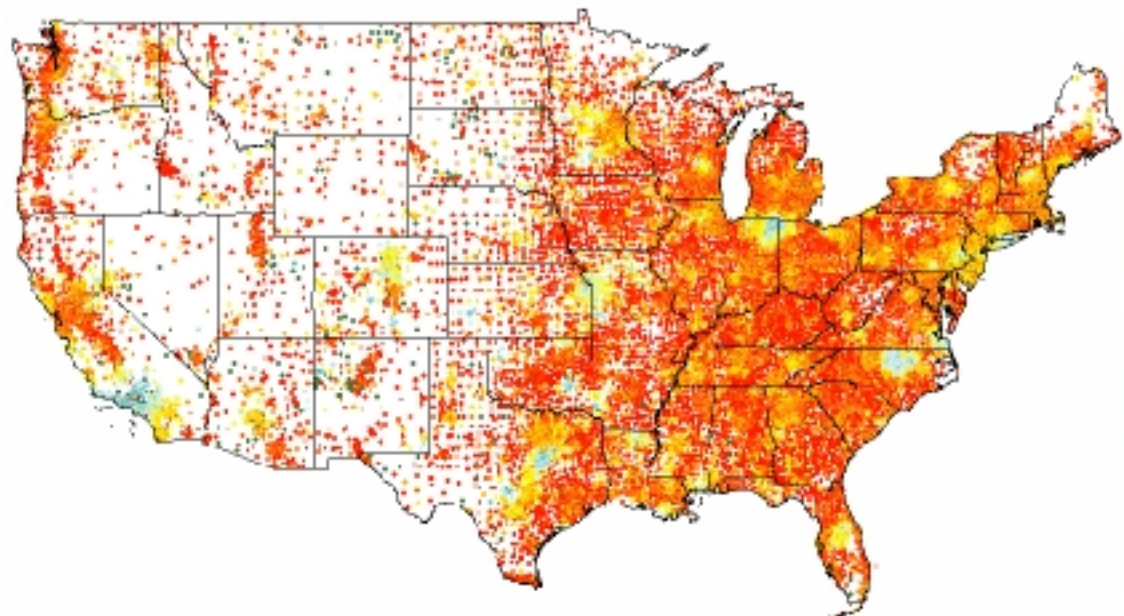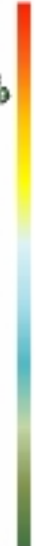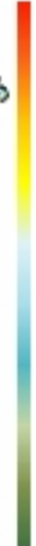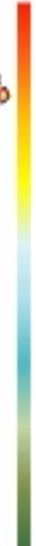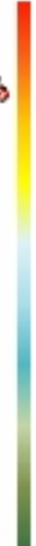

Supplement: pnas_0601266103_7.pdf [file pnas_0601266103_7.pdf]

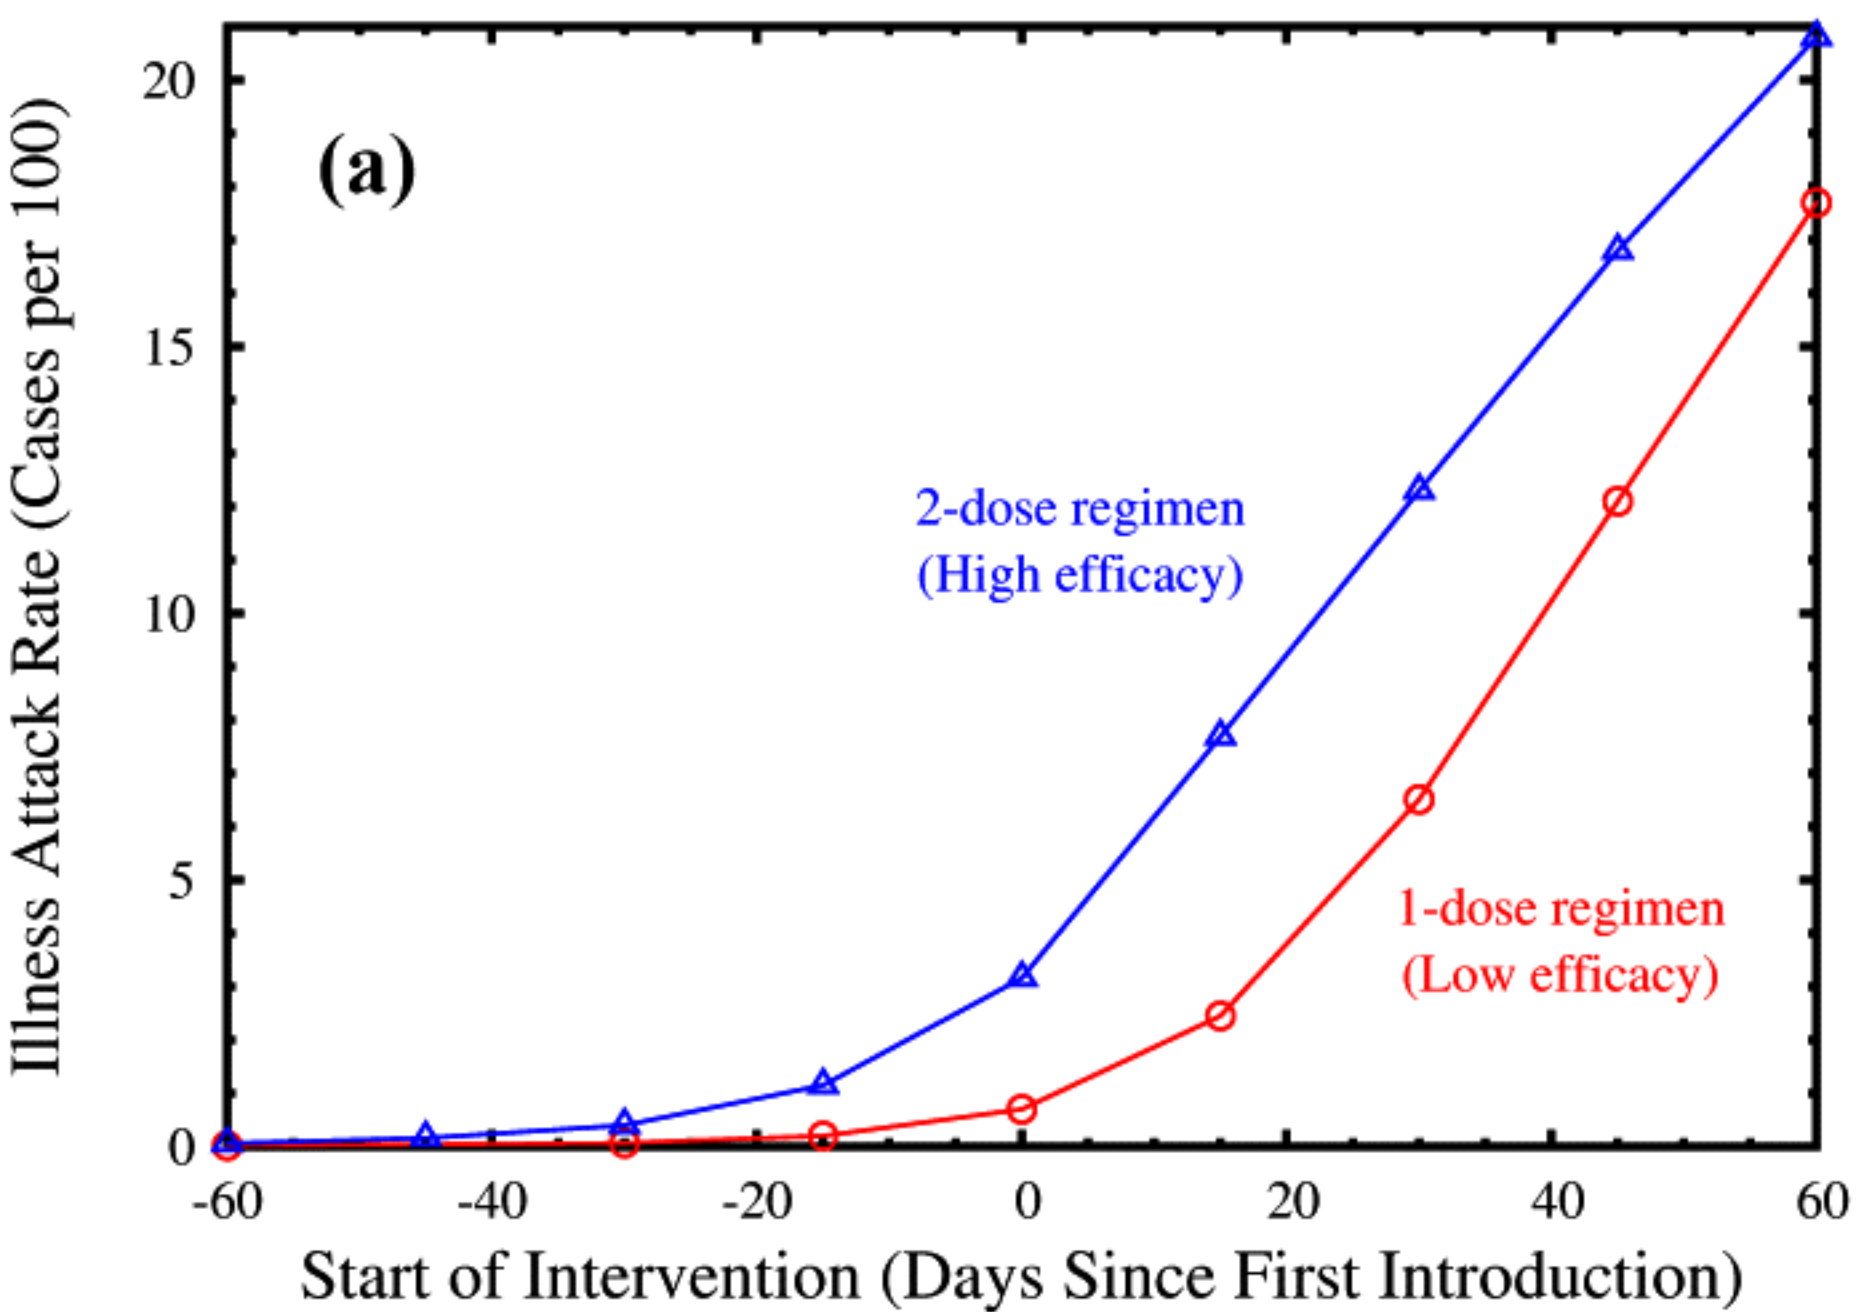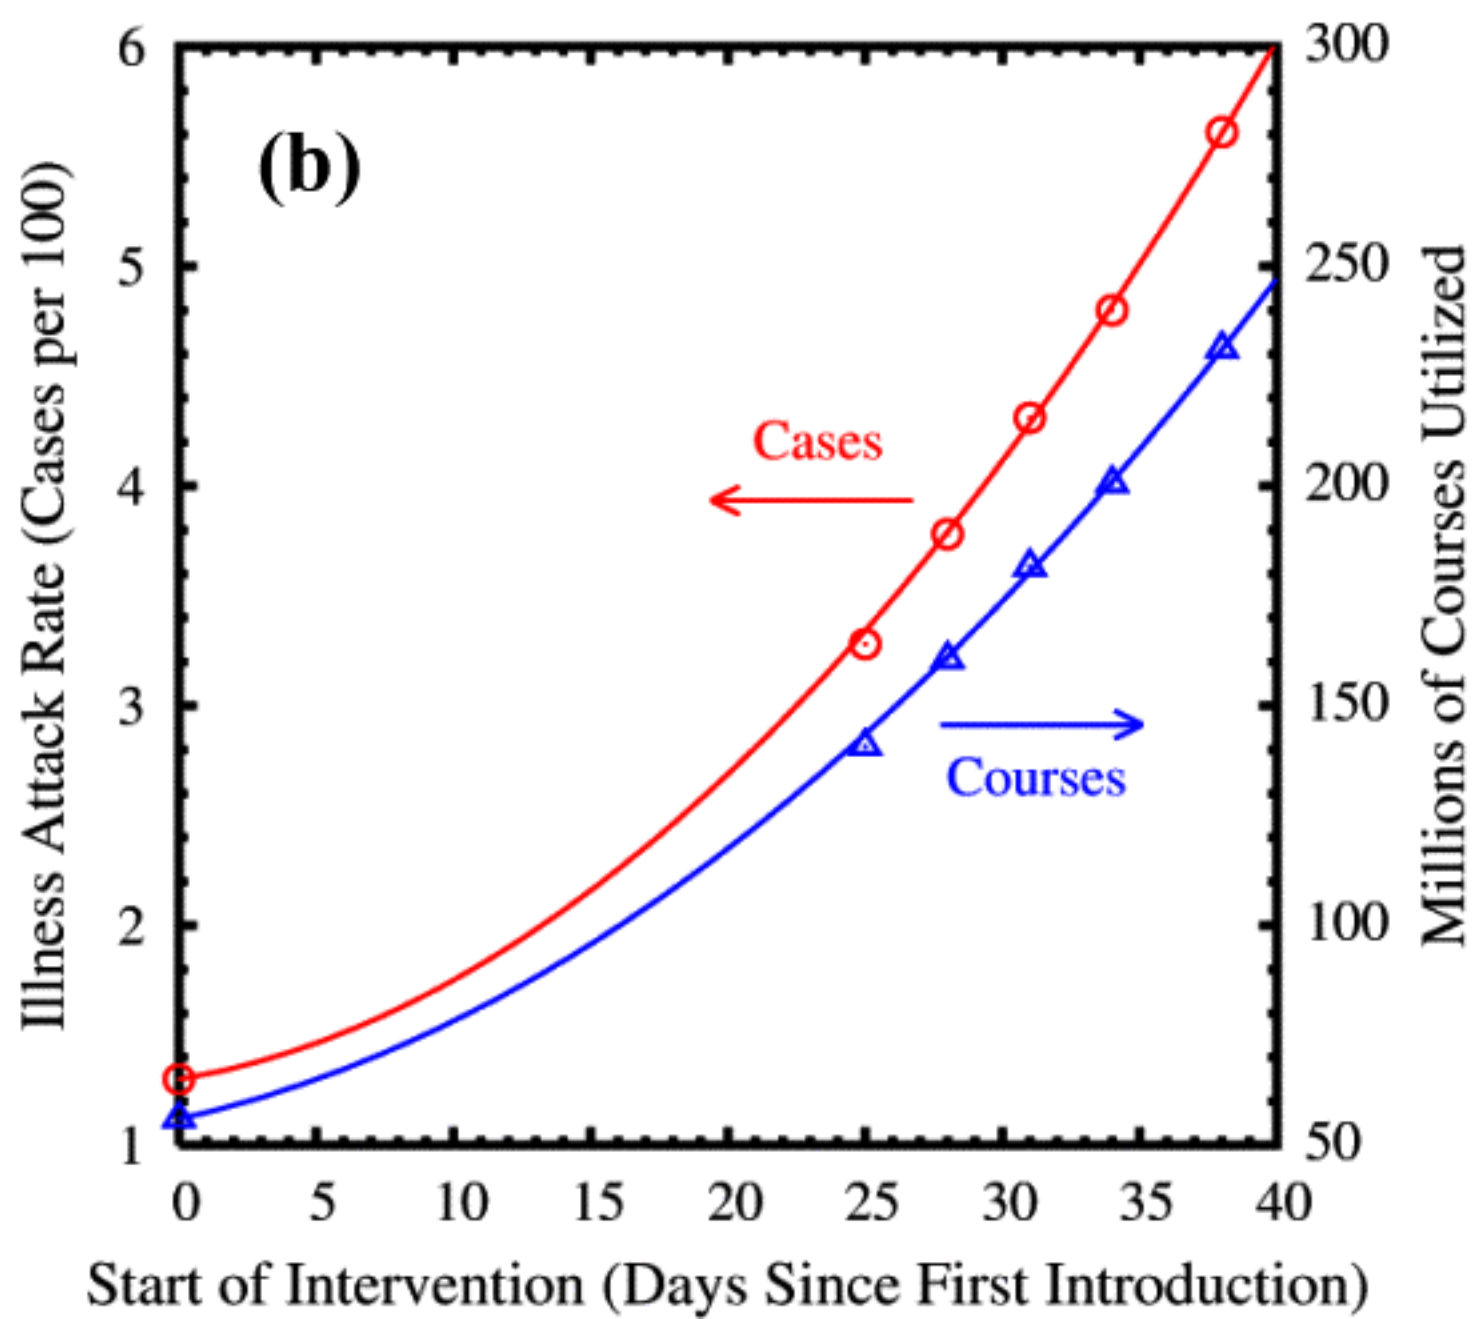

Supplement: pnas_0601266103_8.pdf [file pnas_0601266103_8.pdf]

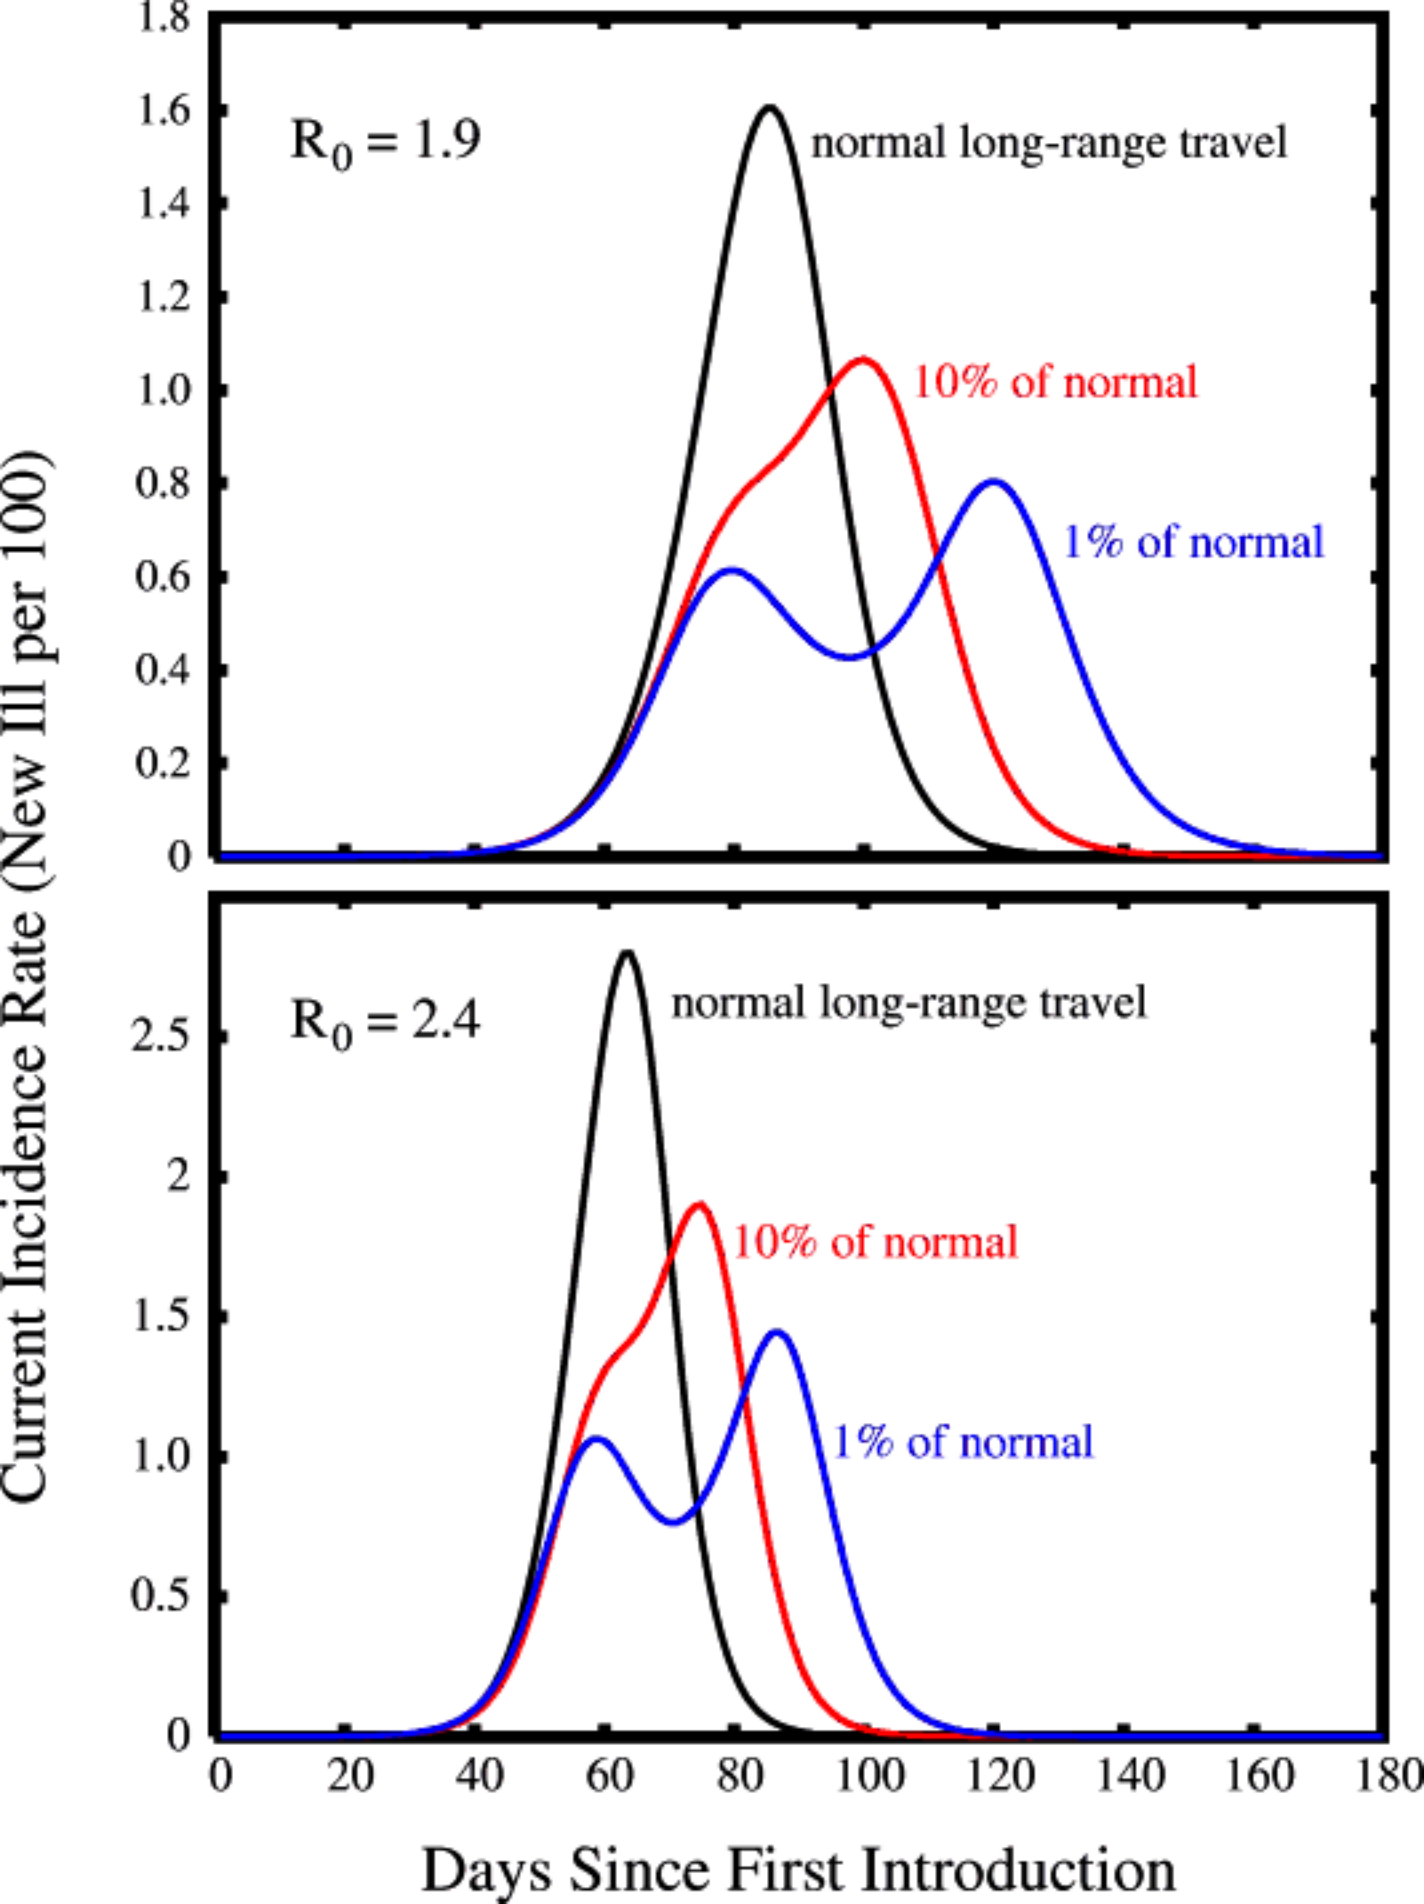

Supplement: pnas_0601266103_9.pdf [file pnas_0601266103_9.pdf]
